# Supplementary material for: Association of Treatment With Medications for Opioid Use Disorder With Mortality After Hospitalization for Injection Drug Use–Associated Infective Endocarditis
Source: PubMed Central journal article supplement (PMC7557514; doi:10.1001/jamanetworkopen.2020.16228), 2020-10-14
Supplement: jamanetwopen-e2016228-s001.pdf [file jamanetwopen-e2016228-s001.pdf]

## Supplemental Online Content

Kimmel SD, Walley AY, Li Y, et al. Association of treatment with medications for opioid use disorder with mortality after hospitalization for injection drug use–associated infective endocarditis. *JAMA Netw Open*. 2020;3(10):e2016228. doi:10.1001/jamanetworkopen.2020.16228

**eFigure 1.** Cohort Construction with Primary Exposure Definition and Follow Up, 2011-2015

**eTable 1.** ICD-9 Codes Used to Define Injection Drug Use

**eFigure 2.** Primary, Secondary, and Tertiary MOUD Exposure Classification and 10 Months Follow Up After Index IDU-IE Hospitalization

**eTable 2.** ICD-9 Codes Used to Define Mental Illness

**eTable 3.** ICD-9 Codes Used to Calculate Elixhauser Scores

**eFigure 3.** Cohort Construction, 2011-2015

**eTable 4.** Sensitivity Analyses: Adjusted Cox Proportional Hazard Models for Association of MOUD With All-Cause Mortality, July 2011 to June 2015

This supplemental material has been provided by the authors to give readers additional information about their work.

**e Figure 1: Cohort Construction with Primary Exposure Definition and Follow Up, 2011-2015**

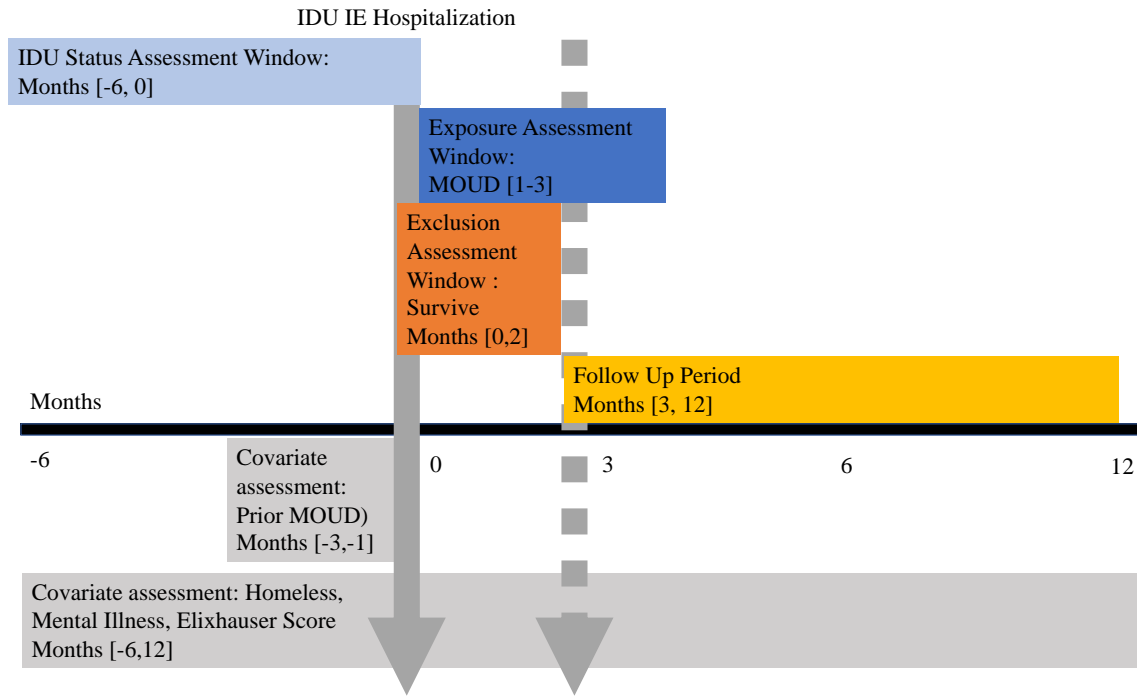

**e Table 1: ICD-9 Codes used to Define Injection Drug Use**

| <b>HCV</b> | <b>ICD9</b> | <b>ICD9 Description</b>                             |
|------------|-------------|-----------------------------------------------------|
|            | 07041       | Acute hepatitis C with hepatic coma                 |
|            | 07044       | Chronic hepatitis C with hepatic coma               |
|            | 07054       | Chronic hepatitis C without mention of hepatic coma |
|            | 07051       | Acute hepatitis C without mention of hepatic coma   |
|            | 07070       | Unspecified viral hepatitis C without hepatic coma  |
|            | 07071       | Unspecified viral hepatitis C with hepatic coma     |
|            | V0262       | Hepatitis C carrier                                 |

| <b>ODU</b> | <b>ICD9</b> | <b>ICD9 Description</b>                                                       |
|------------|-------------|-------------------------------------------------------------------------------|
|            | 30400       | Opioid type dependence, unspecified                                           |
|            | 30401       | Opioid type dependence, continuous                                            |
|            | 30402       | Opioid type dependence, episodic                                              |
|            | 30403       | Opioid type dependence, in remission                                          |
|            | 30470       | Combinations of opioid type drug with any other drug dependence, unspecified  |
|            | 30471       | Combinations of opioid type drug with any other drug dependence, continuous   |
|            | 30472       | Combinations of opioid type drug with any other drug dependence, episodic     |
|            | 30473       | Combinations of opioid type drug with any other drug dependence, in remission |
|            | 30550       | Opioid abuse, unspecified                                                     |
|            | 30551       | Opioid abuse, continuous                                                      |
|            | 30552       | Opioid abuse, episodic                                                        |
|            | 30553       | Opioid abuse, in remission                                                    |

| <b>Drug Abuse Treatment</b> | <b>ICD9</b> | <b>ICD9 Description</b>                                     |
|-----------------------------|-------------|-------------------------------------------------------------|
|                             | 9463        | Alcohol rehabilitation and detoxification                   |
|                             | 9462        | Alcohol detoxification                                      |
|                             | 9464        | Drug rehabilitation                                         |
|                             | 9465        | Drug detoxification                                         |
|                             | 9466        | Drug rehabilitation and detoxification                      |
|                             | 9467        | Combined alcohol and drug rehabilitation                    |
|                             | 9468        | Combined alcohol and drug detoxification                    |
|                             | 9469        | Combined alcohol and drug rehabilitation and detoxification |
|                             | 9445        | Drug addiction counseling                                   |

|  |      |                       |
|--|------|-----------------------|
|  | 9446 | Alcoholism counseling |
|--|------|-----------------------|

| Drug Use | ICD9  | ICD9 Description                                                              |
|----------|-------|-------------------------------------------------------------------------------|
|          | E8500 | Accidental poisoning by heroin                                                |
|          | E0501 | Accidental poisoning by methadone                                             |
|          | E8502 | Accidental poisoning by other opiates and related narcotics                   |
|          | 30400 | Opioid type dependence, unspecified                                           |
|          | 30401 | Opioid type dependence, continuous                                            |
|          | 30402 | Opioid type dependence, episodic                                              |
|          | 30403 | Opioid type dependence, in remission                                          |
|          | 30470 | Combinations of opioid type drug with any other drug dependence, unspecified  |
|          | 30471 | Combinations of opioid type drug with any other drug dependence, continuous   |
|          | 30472 | Combinations of opioid type drug with any other drug dependence, episodic     |
|          | 30473 | Combinations of opioid type drug with any other drug dependence, in remission |
|          | 30550 | Opioid abuse, unspecified                                                     |
|          | 30551 | Opioid abuse, continuous                                                      |
|          | 30552 | Opioid abuse, episodic                                                        |
|          | 30571 | Opioid/other dependence (unspecified)                                         |
|          | 30572 | Opioid/other dependence (continuous)                                          |
|          | 30573 | Opioid/other dependence (episodic)                                            |
|          | 96500 | Poisoning by opium (alkaloids), unspecified                                   |
|          | 96501 | Poisoning by heroin                                                           |
|          | 95602 | Poisoning by Methadone                                                        |
|          | 30421 | Cocaine dependence, continuous                                                |
|          | 30422 | Cocaine dependence, episodic                                                  |
|          | 30423 | Cocaine dependence, in remission                                              |
|          | 30560 | Cocaine abuse, unspecified                                                    |
|          | 30561 | Cocaine abuse, continuous                                                     |

|       |                                                                                                  |
|-------|--------------------------------------------------------------------------------------------------|
| 30562 | Cocaine abuse, episodic                                                                          |
| 30563 | Cocaine abuse, in remission                                                                      |
| 30440 | Amphetamine dependence (unspecified)                                                             |
| 30441 | Amphetamine and other psychostimulant dependence, continuous                                     |
| 30442 | Amphetamine and other psychostimulant dependence, episodic                                       |
| 30571 | Opioid/other dependence (unspecified)                                                            |
| 30572 | Opioid/other dependence (continuous)                                                             |
| 30573 | Opioid/other dependence (episodic)                                                               |
| 96970 | Poisoning by psychostimulant, unspecified                                                        |
| 96971 | Poisoning by caffeine                                                                            |
| 96972 | Poisoning by amphetamines                                                                        |
| 96973 | Poisoning by methylphenidate                                                                     |
| 96979 | Poisoning by other psychostimulants                                                              |
| 2920  | Drug withdrawal syndrome- Drug: abstinence syndrome or symptoms, withdrawal syndrome or symptoms |
| 64833 | Drug dependence of mother, antepartum condition or complication                                  |
| E8542 | Accidental Death Caused by psychostimulants                                                      |

**e Figure 2: Primary,<sup>1</sup> Secondary,<sup>2</sup> and Tertiary<sup>3</sup> MOUD Exposure Classification and 10 Months Follow Up after Index IDU-IE Hospitalization**

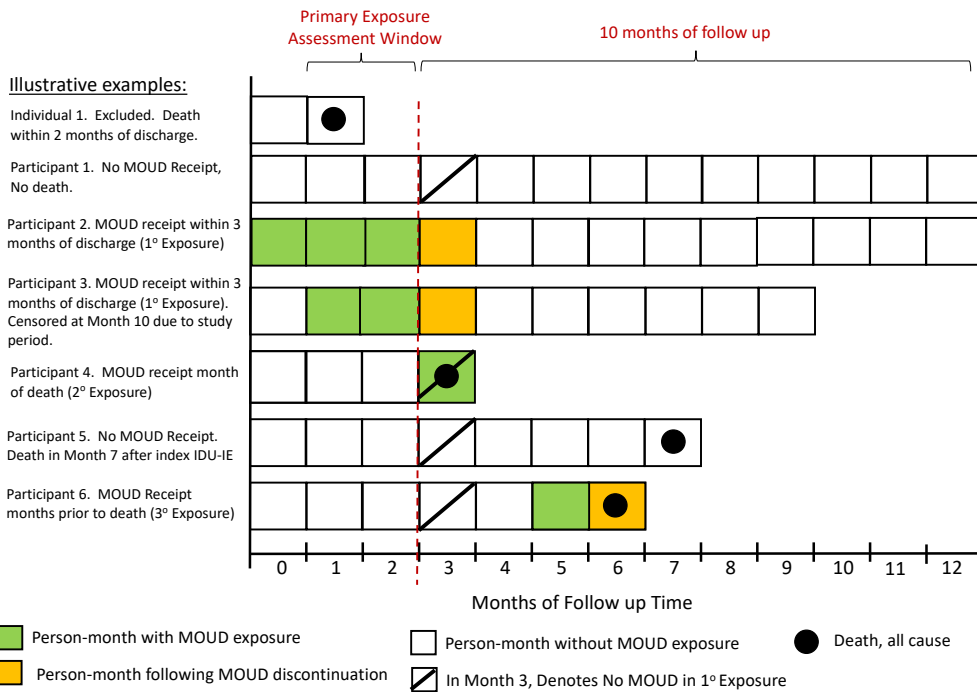

1

<sup>1</sup>An intent-to-treat approach where individuals are classified as exposed to MOUD if they received any MOUD (buprenorphine, methadone, or naltrexone) in the two months following IDU-IE discharge

<sup>2</sup>An as-treated approach to identify time-varying exposure to MOUD where individuals are considered exposed to MOUD in any month in which it was received

<sup>3</sup>An as-treated approach to identify time-varying exposure to MOUD where individuals are considered exposed to MOUD in any month in which it was received including the month following discontinuation

**e Table 2: ICD-9 Codes used to Define Mental Illness**

| <b>Depression</b> | <b>ICD9</b> | <b>ICD9 Description</b>                                                                               |
|-------------------|-------------|-------------------------------------------------------------------------------------------------------|
|                   | 29699       | Other specified episodic mood disorder                                                                |
|                   | 29636       | Major depressive affective disorder, recurrent episode, in full remission                             |
|                   | 29635       | Major depressive affective disorder, recurrent episode, in partial or unspecified remission           |
|                   | 29631       | Major depressive affective disorder, recurrent episode, mild                                          |
|                   | 29632       | Major depressive affective disorder, recurrent episode, moderate                                      |
|                   | 29633       | Major depressive affective disorder, recurrent episode, severe, without mention of psychotic behavior |
|                   | 29630       | Major depressive affective disorder, recurrent episode, unspecified                                   |
|                   | 29634       | Major depressive affective disorder, recurrent episode, severe, specified as with psychotic behavior  |
|                   | 29626       | Major depressive affective disorder, single episode, in full remission                                |
|                   | 29625       | Major depressive affective disorder, single episode, in partial or unspecified remission              |
|                   | 29621       | Major depressive affective disorder, single episode, mild                                             |
|                   | 29622       | Major depressive affective disorder, single episode, moderate                                         |
|                   | 29623       | Major depressive affective disorder, single episode, severe, without mention of psychotic behavior    |
|                   | 29620       | Major depressive affective disorder, single episode, unspecified                                      |
|                   | 29624       | Major depressive affective disorder, single episode, severe, specified as with psychotic behavior     |
|                   | 311         | Depressive disorder, not elsewhere classified                                                         |
|                   | 3004        | Dysthymic disorder                                                                                    |
|                   | 6254        | Premenstrual tension syndromes                                                                        |

| <b>Psychoses</b> | <b>ICD9</b> | <b>ICD9 Description</b>                                       |
|------------------|-------------|---------------------------------------------------------------|
|                  | 29500       | Simple type schizophrenia, unspecified                        |
|                  | 29501       | Simple type schizophrenia, subchronic                         |
|                  | 29502       | Simple type schizophrenia, chronic                            |
|                  | 29503       | Simple type schizophrenia, subchronic with acute exacerbation |
|                  | 29504       | Simple type schizophrenia, chronic with acute exacerbation    |
|                  | 29505       | Simple type schizophrenia, in remission                       |

|       |                                                                            |
|-------|----------------------------------------------------------------------------|
| 29550 | Latent schizophrenia, unspecified                                          |
| 29551 | Latent schizophrenia, subchronic                                           |
| 29552 | Latent schizophrenia, chronic                                              |
| 29553 | Latent schizophrenia, subchronic with acute exacerbation                   |
| 29554 | Latent schizophrenia, chronic with acute exacerbation                      |
| 29555 | Latent schizophrenia, in remission                                         |
| 29580 | Other specified types of schizophrenia, unspecified                        |
| 29581 | Other specified types of schizophrenia, subchronic                         |
| 29582 | Other specified types of schizophrenia, chronic                            |
| 29583 | Other specified types of schizophrenia, subchronic with acute exacerbation |
| 29584 | Other specified types of schizophrenia, chronic with acute exacerbation    |
| 29585 | Other specified types of schizophrenia, in remission                       |
| 29510 | Disorganized type schizophrenia, unspecified                               |
| 29511 | Disorganized type schizophrenia, subchronic                                |
| 29512 | Disorganized type schizophrenia, chronic                                   |
| 29513 | Disorganized type schizophrenia, subchronic with acute exacerbation        |
| 29514 | Disorganized type schizophrenia, chronic with acute exacerbation           |
| 29515 | Disorganized type schizophrenia, in remission                              |
| 29520 | Catatonic type schizophrenia, unspecified                                  |
| 29521 | Catatonic type schizophrenia, subchronic                                   |
| 29522 | Catatonic type schizophrenia, chronic                                      |
| 29523 | Catatonic type schizophrenia, subchronic with acute exacerbation           |
| 29524 | Catatonic type schizophrenia, chronic with acute exacerbation              |
| 29525 | Catatonic type schizophrenia, in remission                                 |
| 29530 | Paranoid type schizophrenia, unspecified                                   |
| 29531 | Paranoid type schizophrenia, subchronic                                    |
| 29532 | Paranoid type schizophrenia, chronic                                       |
| 29533 | Paranoid type schizophrenia, subchronic with acute exacerbation            |
| 29534 | Paranoid type schizophrenia, chronic with acute exacerbation               |
| 29535 | Paranoid type schizophrenia, in remission                                  |
| 29540 | Schizophreniform disorder, unspecified                                     |
| 29541 | Schizophreniform disorder, subchronic                                      |
| 29542 | Schizophreniform disorder, chronic                                         |
| 29543 | Schizophreniform disorder, subchronic with acute exacerbation              |
| 29544 | Schizophreniform disorder, chronic with acute exacerbation                 |



|       |                                                                                            |
|-------|--------------------------------------------------------------------------------------------|
| 29545 | Schizophreniform disorder, in remission                                                    |
| 29560 | Schizophrenic disorders, residual type, unspecified                                        |
| 29561 | Schizophrenic disorders, residual type, subchronic                                         |
| 29562 | Schizophrenic disorders, residual type, chronic                                            |
| 29563 | Schizophrenic disorders, residual type, subchronic with acute exacerbation                 |
| 29564 | Schizophrenic disorders, residual type, chronic with acute exacerbation                    |
| 29565 | Schizophrenic disorders, residual type, in remission                                       |
| 29670 | Schizoaffective disorder, unspecified                                                      |
| 29671 | Schizoaffective disorder, subchronic                                                       |
| 29672 | Schizoaffective disorder, chronic                                                          |
| 29673 | Schizoaffective disorder, subchronic with acute exacerbation                               |
| 29674 | Schizoaffective disorder, chronic with acute exacerbation                                  |
| 29675 | Schizoaffective disorder, in remission                                                     |
| 29590 | Unspecified schizophrenia, unspecified                                                     |
| 29591 | Unspecified schizophrenia, subchronic                                                      |
| 29592 | Unspecified schizophrenia, chronic                                                         |
| 29593 | Unspecified schizophrenia, subchronic with acute exacerbation                              |
| 29594 | Unspecified schizophrenia, chronic with acute exacerbation                                 |
| 29595 | Unspecified schizophrenia, in remission                                                    |
| 29600 | Bipolar I disorder, single manic episode, unspecified                                      |
| 29610 | Manic affective disorder, recurrent episode, unspecified                                   |
| 29601 | Bipolar I disorder, single manic episode, mild                                             |
| 29611 | Manic affective disorder, recurrent episode, mild                                          |
| 29602 | Bipolar I disorder, single manic episode, moderate                                         |
| 29613 | Manic affective disorder, recurrent episode, severe, without mention of psychotic behavior |
| 29603 | Bipolar I disorder, single manic episode, severe, without mention of psychotic behavior    |
| 29612 | Manic affective disorder, recurrent episode, moderate                                      |
| 29604 | Bipolar I disorder, single manic episode, severe, specified as with psychotic behavior     |
| 29614 | Manic affective disorder, recurrent episode, severe, specified as with psychotic behavior  |
| 29605 | Bipolar I disorder, single manic episode, in partial or unspecified remission              |
| 29615 | Manic affective disorder, recurrent episode, in partial or unspecified remission           |

|       |                                                                                                           |
|-------|-----------------------------------------------------------------------------------------------------------|
| 29606 | Bipolar I disorder, single manic episode, in full remission                                               |
| 29616 | Manic affective disorder, recurrent episode, in full remission                                            |
| 29620 | Major depressive affective disorder, single episode, unspecified                                          |
| 29621 | Major depressive affective disorder, single episode, mild                                                 |
| 29622 | Major depressive affective disorder, single episode, moderate                                             |
| 29623 | Major depressive affective disorder, single episode, severe, without mention of psychotic behavior        |
| 29624 | Major depressive affective disorder, single episode, severe, specified as with psychotic behavior         |
| 29625 | Major depressive affective disorder, single episode, in partial or unspecified remission                  |
| 29626 | Major depressive affective disorder, single episode, in full remission                                    |
| 29630 | Major depressive affective disorder, recurrent episode, unspecified                                       |
| 29631 | Major depressive affective disorder, recurrent episode, mild                                              |
| 29632 | Major depressive affective disorder, recurrent episode, moderate                                          |
| 29633 | Major depressive affective disorder, recurrent episode, severe, without mention of psychotic behavior     |
| 29634 | Major depressive affective disorder, recurrent episode, severe, specified as with psychotic behavior      |
| 29635 | Major depressive affective disorder, recurrent episode, in partial or unspecified remission               |
| 29636 | Major depressive affective disorder, recurrent episode, in full remission                                 |
| 29640 | Bipolar I disorder, most recent episode (or current) manic, unspecified                                   |
| 29641 | Bipolar I disorder, most recent episode (or current) manic, mild                                          |
| 29642 | Bipolar I disorder, most recent episode (or current) manic, moderate                                      |
| 29643 | Bipolar I disorder, most recent episode (or current) manic, severe, without mention of psychotic behavior |
| 29644 | Bipolar I disorder, most recent episode (or current) manic, severe, specified as with psychotic behavior  |
| 29645 | Bipolar I disorder, most recent episode (or current) manic, in partial or unspecified remission           |
| 29646 | Bipolar I disorder, most recent episode (or current) manic, in full remission                             |

|       |                                                                                                               |
|-------|---------------------------------------------------------------------------------------------------------------|
| 29650 | Bipolar I disorder, most recent episode (or current) depressed, unspecified                                   |
| 29651 | Bipolar I disorder, most recent episode (or current) depressed, mild                                          |
| 29652 | Bipolar I disorder, most recent episode (or current) depressed, moderate                                      |
| 29653 | Bipolar I disorder, most recent episode (or current) depressed, severe, without mention of psychotic behavior |
| 29654 | Bipolar I disorder, most recent episode (or current) depressed, severe, specified as with psychotic behavior  |
| 29655 | Bipolar I disorder, most recent episode (or current) depressed, in partial or unspecified remission           |
| 29656 | Bipolar I disorder, most recent episode (or current) depressed, in full remission                             |
| 29660 | Bipolar I disorder, most recent episode (or current) mixed, unspecified                                       |
| 29660 | Bipolar I disorder, most recent episode (or current) mixed, mild                                              |
| 29660 | Bipolar I disorder, most recent episode (or current) mixed, moderate                                          |
| 29660 | Bipolar I disorder, most recent episode (or current) mixed, severe, without mention of psychotic behavior     |
| 29660 | Bipolar I disorder, most recent episode (or current) mixed, severe, specified as with psychotic behavior      |
| 29660 | Bipolar I disorder, most recent episode (or current) mixed, in partial or unspecified remission               |
| 29660 | Bipolar I disorder, most recent episode (or current) mixed, in full remission                                 |
| 2967  | Bipolar I disorder, most recent episode (or current) unspecified                                              |
| 29680 | Bipolar disorder, unspecified                                                                                 |
| 29681 | Atypical manic disorder                                                                                       |
| 29682 | Atypical depressive disorder                                                                                  |
| 29689 | Other bipolar disorders                                                                                       |
| 29690 | Unspecified episodic mood disorder                                                                            |
| 29699 | Other specified episodic mood disorder                                                                        |
| 2970  | Paranoid state, simple                                                                                        |
| 2971  | Delusional disorder                                                                                           |
| 2972  | Paraphrenia                                                                                                   |
| 2978  | Other specified paranoid states                                                                               |
| 2973  | Shared psychotic disorder                                                                                     |

|       |                                                            |
|-------|------------------------------------------------------------|
| 2979  | Unspecified paranoid state                                 |
| 2983  | Acute paranoid reaction                                    |
| 2984  | Psychogenic paranoid psychosis                             |
| 2988  | Other and unspecified reactive psychosis                   |
| 2980  | Depressive type psychosis                                  |
| 2981  | Excitative type psychosis                                  |
| 2982  | Reactive confusion                                         |
| 2989  | Unspecified psychosis                                      |
| 29910 | Childhood disintegrative disorder, current or active state |
| 29911 | Childhood disintegrative disorder, residual state          |

| <b>Anxiety</b> | <b>ICD9</b> | <b>ICD9 Description</b>          |
|----------------|-------------|----------------------------------|
|                | 3002        | Generalized anxiety disorder     |
|                | 3009        | Other specified anxiety disorder |
|                | 3001        | Panic disorder                   |
|                | 30000       | Unspecified anxiety disorder     |

**e Table 3: ICD-9 Codes used to calculate Elixhauser Scores**

| <b>HIV</b> | <b>ICD9</b> | <b>ICD9 Description</b>                                          |
|------------|-------------|------------------------------------------------------------------|
|            | 042         | Human immunodeficiency virus [HIV] disease                       |
|            | 27910       | Immunodeficiency with predominant T-cell defect, unspecified     |
|            | V08         | Asymptomatic human immunodeficiency virus [HIV] infection status |

| <b>Liver</b> | <b>ICD9</b> | <b>ICD9 Description</b>                                                                      |
|--------------|-------------|----------------------------------------------------------------------------------------------|
|              | 07032       | Chronic viral hepatitis B without mention of hepatic coma without mention of hepatitis delta |
|              | 07054       | Chronic hepatitis C without mention of hepatic coma                                          |
|              | 4560        | Esophageal varices with bleeding                                                             |
|              | 4561        | Esophageal varices without mention of bleeding                                               |
|              | 45620       | Esophageal varices in diseases classified elsewhere, with bleeding                           |
|              | 45621       | Esophageal varices in diseases classified elsewhere, without mention of bleeding             |
|              | 5710        | Alcoholic fatty liver                                                                        |
|              | 5712        | Alcoholic cirrhosis of liver                                                                 |

|       |                                                              |
|-------|--------------------------------------------------------------|
| 5713  | Alcoholic liver damage, unspecified                          |
| 57140 | Chronic hepatitis, unspecified                               |
| 57141 | Chronic persistent hepatitis                                 |
| 57142 | Autoimmune hepatitis                                         |
| 57149 | Other chronic hepatitis                                      |
| 5715  | Cirrhosis of liver without mention of alcohol                |
| 5716  | Biliary cirrhosis                                            |
| 5718  | Other chronic nonalcoholic liver disease                     |
| 5719  | Unspecified chronic liver disease without mention of alcohol |
| 5723  | Portal hypertension                                          |
| 5728  | Other sequelae of chronic liver disease                      |
| V427  | Liver replaced by transplant                                 |

| Congestive Heart Failure | ICD9  | ICD9 Description                                                                                                                                        |
|--------------------------|-------|---------------------------------------------------------------------------------------------------------------------------------------------------------|
|                          | 39891 | Rheumatic heart failure (congestive)                                                                                                                    |
|                          | 40211 | Benign hypertensive heart disease with heart failure                                                                                                    |
|                          | 40291 | Unspecified hypertensive heart disease with heart failure                                                                                               |
|                          | 40411 | Hypertensive heart and chronic kidney disease with heart failure and with chronic kidney disease stage I                                                |
|                          | 40413 | Hypertensive heart and chronic kidney disease, benign, with heart failure and chronic kidney disease stage V or end                                     |
|                          | 40493 | Hypertensive heart and chronic kidney disease, unspecified, with heart failure and chronic kidney disease stage V or end stage renal disease            |
|                          | 40491 | Hypertensive heart and chronic kidney disease, unspecified, with heart failure and with chronic kidney disease stage I through stage IV, or unspecified |
|                          | 4280  | Congestive heart failure, unspecified                                                                                                                   |
|                          | 4281  | Left heart failure                                                                                                                                      |
|                          | 42820 | Systolic heart failure, unspecified                                                                                                                     |
|                          | 42821 | Acute systolic heart failure                                                                                                                            |
|                          | 42822 | Chronic systolic heart failure                                                                                                                          |
|                          | 42823 | Acute on chronic systolic heart failure                                                                                                                 |
|                          | 42830 | Diastolic heart failure, unspecified                                                                                                                    |
|                          | 42831 | Acute diastolic heart failure                                                                                                                           |

|       |                                                                |
|-------|----------------------------------------------------------------|
| 42832 | Chronic diastolic heart failure                                |
| 42833 | Acute on chronic diastolic heart failure                       |
| 42840 | Combined systolic and diastolic heart failure, unspecified     |
| 42841 | Acute combined systolic and diastolic heart failure            |
| 42842 | Chronic combined systolic and diastolic heart failure          |
| 42843 | Acute on chronic combined systolic and diastolic heart failure |
| 4289  | Heart failure, unspecified                                     |

| Arrhythmia | ICD9  | ICD9 Description                                              |
|------------|-------|---------------------------------------------------------------|
|            | 42610 | Atrioventricular block, unspecified                           |
|            | 42611 | First degree atrioventricular block                           |
|            | 42612 | Mobitz (type) II atrioventricular block                       |
|            | 42613 | Other second degree atrioventricular block                    |
|            | 4262  | Left bundle branch hemiblock                                  |
|            | 4263  | Other left bundle branch block                                |
|            | 4264  | Right bundle branch block                                     |
|            | 42650 | Bundle branch block, unspecified                              |
|            | 42651 | Right bundle branch block and left posterior fascicular block |
|            | 42652 | Right bundle branch block and left anterior fascicular block  |
|            | 42653 | Other bilateral bundle branch block                           |
|            | 4266  | Other heart block                                             |
|            | 4267  | Anomalous atrioventricular excitation                         |
|            | 42681 | Lown-Ganong-Levine syndrome                                   |
|            | 42682 | Long QT syndrome                                              |
|            | 42689 | Other specified conduction disorders                          |
|            | 4270  | Paroxysmal supraventricular tachycardia                       |
|            | 4272  | Paroxysmal tachycardia, unspecified                           |
|            | 42731 | Atrial fibrillation                                           |
|            | 42760 | Premature beats, unspecified                                  |
|            | 4279  | Cardiac dysrhythmia, unspecified                              |
|            | 7850  | Tachycardia, unspecified                                      |
|            | V4500 | Unspecified cardiac device in situ                            |
|            | V4501 | Cardiac pacemaker in situ                                     |
|            | V4502 | Automatic implantable cardiac defibrillator in situ           |

|  |       |                                                                       |
|--|-------|-----------------------------------------------------------------------|
|  | V4509 | Other specified cardiac device in situ                                |
|  | V5331 | Fitting and adjustment of cardiac pacemaker                           |
|  | V5332 | Fitting and adjustment of automatic implantable cardiac defibrillator |
|  | V5339 | Fitting and adjustment of other cardiac device                        |

| Vascular Disease | ICD9  | ICD9 Description                                                           |
|------------------|-------|----------------------------------------------------------------------------|
|                  | 09320 | Syphilitic endocarditis of valve, unspecified                              |
|                  | 3940  | Mitral stenosis                                                            |
|                  | 3941  | Rheumatic mitral insufficiency                                             |
|                  | 3942  | Mitral stenosis with insufficiency                                         |
|                  | 3949  | Other and unspecified mitral valve diseases                                |
|                  | 3950  | Rheumatic aortic stenosis                                                  |
|                  | 3951  | Rheumatic aortic insufficiency                                             |
|                  | 3952  | Rheumatic aortic stenosis with insufficiency                               |
|                  | 3959  | Other and unspecified rheumatic aortic diseases                            |
|                  | 3960  | Mitral valve stenosis and aortic valve stenosis                            |
|                  | 3961  | Mitral valve stenosis and aortic valve insufficiency                       |
|                  | 3962  | Mitral valve insufficiency and aortic valve stenosis                       |
|                  | 3963  | Mitral valve insufficiency and aortic valve insufficiency                  |
|                  | 3968  | Multiple involvement of mitral and aortic valves                           |
|                  | 3969  | Mitral and aortic valve diseases, unspecified                              |
|                  | 3970  | Diseases of tricuspid valve                                                |
|                  | 3971  | Rheumatic diseases of pulmonary valve                                      |
|                  | 4240  | Mitral valve disorders                                                     |
|                  | 4241  | Aortic valve disorders                                                     |
|                  | 4242  | Diseases of tricuspid valve                                                |
|                  | 4243  | Tricuspid valve disorders, specified as nonrheumatic                       |
|                  | 42490 | Endocarditis in diseases classified elsewhere                              |
|                  | 42491 | Acute and subacute infective endocarditis in diseases classified elsewhere |
|                  | 7463  | Congenital stenosis of aortic valve                                        |
|                  | 7464  | Congenital insufficiency of aortic valve                                   |
|                  | 7465  | Congenital mitral stenosis                                                 |
|                  | 7466  | Congenital mitral insufficiency                                            |
|                  | V422  | Heart valve replaced by transplant                                         |
|                  | V433  | Heart valve replaced by other means                                        |

| Pulmonary/Circulatory Disease | ICD9 | ICD9 Description                                  |
|-------------------------------|------|---------------------------------------------------|
|                               | 4160 | Primary pulmonary hypertension                    |
|                               | 4161 | Kyphoscoliotic heart disease                      |
|                               | 4162 | Chronic pulmonary embolism                        |
|                               | 4168 | Other chronic pulmonary heart diseases            |
|                               | 4169 | Chronic pulmonary heart disease, unspecified      |
|                               | 4179 | Other specified diseases of pulmonary circulation |

| Peripheral Vascular Disease | ICD9  | ICD9 Description                                                                     |
|-----------------------------|-------|--------------------------------------------------------------------------------------|
|                             | 4400  | Atherosclerosis of aorta                                                             |
|                             | 4401  | Atherosclerosis of renal artery                                                      |
|                             | 44020 | Atherosclerosis of native arteries of the extremities, unspecified                   |
|                             | 44021 | Atherosclerosis of native arteries of the extremities with intermittent claudication |
|                             | 44022 | Atherosclerosis of native arteries of the extremities with rest pain                 |
|                             | 44023 | Atherosclerosis of native arteries of the extremities with ulceration                |
|                             | 44024 | Atherosclerosis of native arteries of the extremities with gangrene                  |
|                             | 44029 | Other atherosclerosis of native arteries of the extremities                          |
|                             | 44030 | Atherosclerosis of unspecified bypass graft of the extremities                       |
|                             | 44031 | Atherosclerosis of autologous vein bypass graft of the extremities                   |
|                             | 44032 | Atherosclerosis of nonautologous biological bypass graft of the extremities          |
|                             | 4404  | Chronic total occlusion of artery of the extremities                                 |
|                             | 4408  | Atherosclerosis of other specified arteries                                          |
|                             | 4409  | Generalized and unspecified atherosclerosis                                          |
|                             | 4412  | Thoracic aneurysm without mention of rupture                                         |
|                             | 4414  | Abdominal aneurysm without mention of rupture                                        |
|                             | 4417  | Thoracoabdominal aneurysm, without mention of rupture                                |
|                             | 4419  | Aortic aneurysm of unspecified site without mention of rupture                       |
|                             | 4431  | Thromboangiitis obliterans [Buerger's disease]                                       |
|                             | 44321 | Dissection of carotid artery                                                         |
|                             | 44322 | Dissection of iliac artery                                                           |



|       |                                                        |
|-------|--------------------------------------------------------|
| 44323 | Dissection of renal artery                             |
| 44324 | Dissection of vertebral artery                         |
| 44329 | Dissection of other artery                             |
| 44381 | Peripheral angiopathy in diseases classified elsewhere |
| 44382 | Erythromelalgia                                        |
| 44389 | Other specified peripheral vascular diseases           |
| 4439  | Peripheral vascular disease, unspecified               |
| 4471  | Stricture of artery                                    |
| 5571  | Chronic vascular insufficiency of intestine            |
| 5579  | Unspecified vascular insufficiency of intestine        |
| V434  | Blood vessel replaced by other means                   |

| Hypertension, Controlled | ICD9 | ICD9 Description                   |
|--------------------------|------|------------------------------------|
|                          | 4011 | Benign essential hypertension      |
|                          | 4010 | Malignant essential hypertension   |
|                          | 4019 | Unspecified essential hypertension |

| Hypertension, Uncontrolled | ICD9  | ICD9 Description                                                                                                                                        |
|----------------------------|-------|---------------------------------------------------------------------------------------------------------------------------------------------------------|
|                            | 40200 | Malignant hypertensive heart disease without heart failure                                                                                              |
|                            | 40210 | Benign hypertensive heart disease without heart failure                                                                                                 |
|                            | 40211 | Benign hypertensive heart disease with heart failure                                                                                                    |
|                            | 40201 | Malignant hypertensive heart disease with heart failure                                                                                                 |
|                            | 40291 | Unspecified hypertensive heart disease with heart failure                                                                                               |
|                            | 40290 | Unspecified hypertensive heart disease without heart failure                                                                                            |
|                            | 40401 | Hypertensive heart and chronic kidney disease, malignant, with heart failure and with chronic kidney disease stage I through stage IV, or unspecified   |
|                            | 40411 | Hypertensive heart and chronic kidney disease, benign, with heart failure and with chronic kidney disease stage I through stage IV, or unspecified      |
|                            | 40491 | Hypertensive heart and chronic kidney disease, unspecified, with heart failure and with chronic kidney disease stage I through stage IV, or unspecified |
|                            | 40501 | Malignant renovascular hypertension                                                                                                                     |
|                            | 40511 | Benign renovascular hypertension                                                                                                                        |
|                            | 40591 | Unspecified renovascular hypertension                                                                                                                   |
|                            | 40509 | Other malignant secondary hypertension                                                                                                                  |
|                            | 40519 | Other benign secondary hypertension                                                                                                                     |

|  |       |                                          |
|--|-------|------------------------------------------|
|  | 40599 | Other unspecified secondary hypertension |
|--|-------|------------------------------------------|

| Paralysis | ICD9  | ICD9 Description                                              |
|-----------|-------|---------------------------------------------------------------|
|           | 34200 | Flaccid hemiplegia and hemiparesis affecting unspecified side |
|           | 34210 | Spastic hemiplegia and hemiparesis affecting unspecified side |
|           | 34290 | Hemiplegia, unspecified, affecting unspecified side           |
|           | 34291 | Hemiplegia, unspecified, affecting dominant side              |
|           | 34292 | Hemiplegia, unspecified, affecting nondominant side           |
|           | 34400 | Quadriplegia, unspecified                                     |
|           | 34409 | Other quadriplegia                                            |
|           | 34401 | Quadriplegia, C1-C4, complete                                 |
|           | 34402 | Quadriplegia, C1-C4, incomplete                               |
|           | 34403 | Quadriplegia, C5-C7, complete                                 |
|           | 34404 | Quadriplegia, C5-C7, incomplete                               |
|           | 3441  | Paraplegia                                                    |
|           | 3442  | Diplegia of upper limbs                                       |
|           | 34430 | Monoplegia of lower limb affecting unspecified side           |
|           | 34431 | Monoplegia of lower limb affecting dominant side              |
|           | 34432 | Monoplegia of lower limb affecting nondominant side           |
|           | 34440 | Monoplegia of upper limb affecting unspecified side           |
|           | 34441 | Monoplegia of upper limb affecting dominant side              |
|           | 34442 | Monoplegia of upper limb affecting nondominant side           |
|           | 3445  | Unspecified monoplegia                                        |
|           | 35560 | Cauda equina syndrome without mention of neurogenic bladder   |
|           | 34461 | Cauda equina syndrome with neurogenic bladder                 |
|           | 34481 | Locked-in state                                               |
|           | 34489 | Other specified paralytic syndrome                            |
|           | 3449  | Paralysis, unspecified                                        |

| Neurologic Disease | ICD9 | ICD9 Description                   |
|--------------------|------|------------------------------------|
|                    | 3319 | Cerebral degeneration, unspecified |
|                    | 3320 | Paralysis agitans                  |
|                    | 3334 | Huntington's chorea                |
|                    | 3335 | Other choreas                      |
|                    | 3340 | Friedreich's ataxia                |
|                    | 3343 | Other cerebellar ataxia            |
|                    | 3341 | Hereditary spastic paraplegia      |
|                    | 3342 | Primary cerebellar degeneration    |

|       |                                                                |
|-------|----------------------------------------------------------------|
| 3344  | Cerebellar ataxia in diseases classified elsewhere             |
| 3348  | Other spinocerebellar diseases                                 |
| 3349  | Spinocerebellar disease, unspecified                           |
| 3350  | Werdnig-Hoffmann disease                                       |
| 33510 | Spinal muscular atrophy, unspecified                           |
| 3359  | Anterior horn cell disease, unspecified                        |
| 33511 | Kugelberg-Welander disease                                     |
| 33519 | Other spinal muscular atrophy                                  |
| 33523 | Pseudobulbar palsy                                             |
| 3358  | Other anterior horn cell diseases                              |
| 33520 | Amyotrophic lateral sclerosis                                  |
| 33521 | Progressive muscular atrophy                                   |
| 33522 | Progressive bulbar palsy                                       |
| 33524 | Primary lateral sclerosis                                      |
| 33529 | Other motor neuron disease                                     |
| 340   | Multiple Sclerosis                                             |
| 3411  | Schilder's disease                                             |
| 34120 | Acute (transverse) myelitis NOS                                |
| 34121 | Acute (transverse) myelitis in conditions classified elsewhere |
| 34122 | Idiopathic transverse myelitis                                 |
| 3418  | Other demyelinating diseases of central nervous system         |
| 3419  | Demyelinating disease of central nervous system, unspecified   |
| 34590 | Epilepsy Unspecified                                           |
| 3481  | Anoxic brain damage                                            |
| 34830 | Encephalopathy, not elsewhere classified                       |
| 78031 | Febrile convulsions (simple), unspecified                      |
| 78032 | Complex febrile convulsions                                    |
| 78033 | Post traumatic seizures                                        |
| 78039 | Other convulsions                                              |
| 7843  | Aphasia                                                        |

| Chronic Pulmonary Disease | ICD9  | ICD9 Description                                         |
|---------------------------|-------|----------------------------------------------------------|
|                           | 490   | Bronchitis, not specified as acute or chronic            |
|                           | 4910  | Simple chronic bronchiti                                 |
|                           | 4911  | Mucopurulent chronic bronchitis                          |
|                           | 49120 | Obstructive chronic bronchitis without exacerbation      |
|                           | 49121 | Obstructive chronic bronchitis with (acute) exacerbation |
|                           | 49122 | Obstructive chronic bronchitis with acute bronchitis     |

|       |                                                      |
|-------|------------------------------------------------------|
| 4918  | Other chronic bronchitis                             |
| 4919  | Unspecified chronic bronchitis                       |
| 4920  | Emphysematous bleb                                   |
| 4928  | Other emphysema                                      |
| 49300 | Extrinsic asthma, unspecified                        |
| 49310 | Intrinsic asthma, unspecified                        |
| 49301 | Extrinsic asthma with status asthmaticus             |
| 49311 | Intrinsic asthma with status asthmaticus             |
| 49302 | Extrinsic asthma with (acute) exacerbation           |
| 49312 | Intrinsic asthma with (acute) exacerbation           |
| 49320 | Chronic obstructive asthma, unspecified              |
| 49321 | Chronic obstructive asthma with status asthmaticus   |
| 49322 | Chronic obstructive asthma with (acute) exacerbation |
| 49381 | Exercise induced bronchospasm                        |
| 49382 | Cough variant asthma                                 |
| 49390 | Asthma,unspecified type, unspecified                 |
| 49391 | Asthma, unspecified type, with status asthmaticus    |
| 4940  | Bronchiectasis without acute exacerbation            |
| 4941  | Bronchiectasis with acute exacerbation               |
| 4950  | Farmers' lung                                        |
| 4951  | Bagassosis                                           |
| 4952  | Bird-fanciers' lung                                  |
| 4953  | Suberosis                                            |
| 4954  | Malt workers' lung                                   |
| 4955  | Mushroom workers' lung                               |
| 4956  | Maple bark-strippers' lung                           |
| 4957  | "Ventilation" pneumonitis                            |
| 4958  | Other specified allergic alveolitis and pneumonitis  |
| 4959  | Unspecified allergic alveolitis and pneumonitis      |
| 496   | Chronic airway obstruction, not elsewhere classified |
| 500   | Coal workers' pneumoconiosis                         |
| 501   | Asbestosis                                           |
| 502   | Pneumoconiosis due to other silica or silicates      |
| 503   | Pneumoconiosis due to other inorganic dust           |
| 504   | Pneumonopathy due to inhalation of other dus         |
| 505   | Pneumoconiosis, unspecified                          |

|  |      |                                                        |
|--|------|--------------------------------------------------------|
|  | 5064 | Chronic respiratory conditions due to fumes and vapors |
|--|------|--------------------------------------------------------|

| Diabetes, Controlled | ICD9  | ICD9 Description                                                                                           |
|----------------------|-------|------------------------------------------------------------------------------------------------------------|
|                      | 25000 | Diabetes mellitus without mention of complication, type II or unspecified type, not stated as uncontrolled |
|                      | 25001 | Diabetes mellitus without mention of complication, type I [juvenile type], not stated as uncontrolled      |
|                      | 25002 | Diabetes mellitus without mention of complication, type II or unspecified type, uncontrolled               |
|                      | 25003 | Diabetes mellitus without mention of complication, type I [juvenile type], uncontrolled                    |
|                      | 25010 | Diabetes with ketoacidosis, type II or unspecified type, not stated as uncontrolled                        |
|                      | 25011 | Diabetes with ketoacidosis, type I [juvenile type], not stated as uncontrolled                             |
|                      | 25012 | Diabetes with ketoacidosis, type II or unspecified type, uncontrolled                                      |
|                      | 25013 | Diabetes with ketoacidosis, type I [juvenile type], uncontrolled                                           |
|                      | 25020 | Diabetes with hyperosmolarity, type II or unspecified type, not stated as uncontrolled                     |
|                      | 25021 | Diabetes with hyperosmolarity, type I [juvenile type], not stated as uncontrolled                          |
|                      | 25022 | Diabetes with hyperosmolarity, type II or unspecified type, uncontrolled                                   |
|                      | 25023 | Diabetes with hyperosmolarity, type I [juvenile type], uncontrolled                                        |
|                      | 25030 | Diabetes with other coma, type II or unspecified type, not stated as uncontrolled                          |
|                      | 25031 | Diabetes with other coma, type I [juvenile type], not stated as uncontrolled                               |
|                      | 25032 | Diabetes with other coma, type II or unspecified type, uncontrolled                                        |
|                      | 25033 | Diabetes with other coma, type I [juvenile type], uncontrolled                                             |

| Diabetes, Uncontrolled | ICD9  | ICD9 Description                                                                            |
|------------------------|-------|---------------------------------------------------------------------------------------------|
|                        | 25040 | Diabetes with renal manifestations, type II or unspecified type, not stated as uncontrolled |
|                        | 24041 | Diabetes with renal manifestations, type I [juvenile type], not stated as uncontrolled      |

|       |                                                                                                         |
|-------|---------------------------------------------------------------------------------------------------------|
| 25042 | Diabetes with renal manifestations, type II or unspecified type, uncontrolled                           |
| 25043 | Diabetes with renal manifestations, type I [juvenile type], uncontrolled                                |
| 25050 | Diabetes with ophthalmic manifestations, type II or unspecified type, not stated as uncontrolled        |
| 25051 | Diabetes with ophthalmic manifestations, type I [juvenile type], not stated as uncontrolled             |
| 25060 | Diabetes with neurological manifestations, type II or unspecified type, not stated as uncontrolled      |
| 25061 | Diabetes with neurological manifestations, type I [juvenile type], not stated as uncontrolled           |
| 25063 | Diabetes with neurological manifestations, type I [juvenile type], uncontrolled                         |
| 25062 | Diabetes with neurological manifestations, type II or unspecified type, uncontrolled                    |
| 25070 | Diabetes with peripheral circulatory disorders, type II or unspecified type, not stated as uncontrolled |
| 25071 | Diabetes with peripheral circulatory disorders, type I [juvenile type], not stated as uncontrolled      |
| 25072 | Diabetes with peripheral circulatory disorders, type II or unspecified type, uncontrolled               |
| 25073 | Diabetes with peripheral circulatory disorders, type I [juvenile type], uncontrolled                    |
| 25090 | Diabetes with unspecified complication, type II or unspecified type, not stated as uncontrolled         |
| 25091 | Diabetes with unspecified complication, type I [juvenile type], not stated as uncontrolled              |
| 25092 | Diabetes with unspecified complication, type II or unspecified type, uncontrolled                       |
| 25093 | Diabetes with unspecified complication, type I [juvenile type], uncontrolled                            |

| Hypothyroidism | ICD9 | ICD9 Description                  |
|----------------|------|-----------------------------------|
|                | 243  | Congenital hypothyroidism         |
|                | 2440 | Postsurgical hypothyroidism       |
|                | 2441 | Other postablative hypothyroidism |
|                | 2442 | Iodine hypothyroidism             |

|  |      |                                         |
|--|------|-----------------------------------------|
|  | 2448 | Other specified acquired hypothyroidism |
|  | 2449 | Unspecified acquired hypothyroidism     |

| Renal Failure | ICD9  | ICD9 Description                                                                                                                                     |
|---------------|-------|------------------------------------------------------------------------------------------------------------------------------------------------------|
|               | 40311 | Hypertensive chronic kidney disease, benign, with chronic kidney disease stage V or end stage renal disease                                          |
|               | 40391 | Hypertensive chronic kidney disease, unspecified, with chronic kidney disease stage V or end stage renal disease                                     |
|               | 40412 | Hypertensive heart and chronic kidney disease, benign, without heart failure and with chronic kidney disease stage V or end stage renal disease      |
|               | 40492 | Hypertensive heart and chronic kidney disease, unspecified, without heart failure and with chronic kidney disease stage V or end stage renal disease |
|               | 5851  | Chronic kidney disease, Stage I                                                                                                                      |
|               | 5852  | Chronic kidney disease, Stage II (mild)                                                                                                              |
|               | 5853  | Chronic kidney disease, Stage III (moderate)                                                                                                         |
|               | 5854  | Chronic kidney disease, Stage IV (severe)                                                                                                            |
|               | 5855  | Chronic kidney disease, Stage V                                                                                                                      |
|               | 5856  | End stage renal disease                                                                                                                              |
|               | 5859  | Chronic kidney disease, unspecified                                                                                                                  |
|               | 586   | Renal Failure, unspecified                                                                                                                           |
|               | V420  | Kidney replaced by transplant                                                                                                                        |
|               | V4511 | Renal dialysis status                                                                                                                                |
|               | V4512 | Noncompliance with renal dialysis                                                                                                                    |
|               | V560  | Encounter for extracorporeal dialysis                                                                                                                |
|               | V568  | Encounter for other dialysis                                                                                                                         |

| Peptic Ulcer | ICD9  | ICD9 Description                                                                                                             |
|--------------|-------|------------------------------------------------------------------------------------------------------------------------------|
|              | 53170 | Chronic gastric ulcer without mention of hemorrhage or perforation, without mention of obstruction                           |
|              | 53190 | Gastric ulcer, unspecified as acute or chronic, without mention of hemorrhage or perforation, without mention of obstruction |
|              | 53270 | Chronic duodenal ulcer without mention of hemorrhage or perforation, without mention of obstruction                          |
|              | 53290 | Duodenal ulcer, unspecified as acute or chronic, without hemorrhage or perforation, without mention of obstruction           |

|  |       |                                                                                                                                                 |
|--|-------|-------------------------------------------------------------------------------------------------------------------------------------------------|
|  | 53370 | Chronic peptic ulcer of unspecified site without mention of hemorrhage or perforation, without mention of obstruction                           |
|  | 53390 | Peptic ulcer of unspecified site, unspecified as acute or chronic, without mention of hemorrhage or perforation, without mention of obstruction |
|  | 53470 | Chronic gastrojejunal ulcer without mention of hemorrhage or perforation, without mention of obstruction                                        |
|  | 53490 | Gastrojejunal ulcer, unspecified as acute or chronic, without mention of hemorrhage or perforation, without mention of obstruction              |
|  | V1271 | Personal history of peptic ulcer disease                                                                                                        |

| Lymphoma | ICD9  | ICD9 Description                                                    |
|----------|-------|---------------------------------------------------------------------|
|          | 20000 | Reticulosarcoma, unspecified site, extranodal and solid organ sites |
|          | 20001 | Reticulosarcoma, lymph nodes of head, face, and neck                |
|          | 20002 | Reticulosarcoma, intrathoracic lymph nodes                          |
|          | 20003 | Reticulosarcoma, intra-abdominal lymph nodes                        |
|          | 20004 | Reticulosarcoma, lymph nodes of axilla and upper limb               |
|          | 20005 | Reticulosarcoma, lymph nodes of inguinal region and lower limb      |
|          | 20006 | Reticulosarcoma, intrapelvic lymph nodes                            |
|          | 20007 | Reticulosarcoma, spleen                                             |
|          | 20008 | Reticulosarcoma, lymph nodes of multiple sites                      |
|          | 20010 | Lymphosarcoma, unspecified site, extranodal and solid organ sites   |
|          | 20011 | Lymphosarcoma, lymph nodes of head, face, and neck                  |
|          | 20012 | Lymphosarcoma, intrathoracic lymph nodes                            |
|          | 20013 | Lymphosarcoma, intra-abdominal lymph nodes                          |
|          | 20014 | Lymphosarcoma, lymph nodes of axilla and upper limb                 |
|          | 20015 | Lymphosarcoma, lymph nodes of inguinal region and lower limb        |
|          | 20016 | Lymphosarcoma, intrapelvic lymph nodes                              |
|          | 20017 | Lymphosarcoma, spleen                                               |



|       |                                                                                 |
|-------|---------------------------------------------------------------------------------|
| 20018 | Lymphosarcoma, lymph nodes of multiple sites                                    |
| 20020 | Burkitt's tumor or lymphoma, unspecified site, extranodal and solid organ sites |
| 20021 | Burkitt's tumor or lymphoma, lymph nodes of head, face, and neck                |
| 20022 | Burkitt's tumor or lymphoma, intrathoracic lymph nodes                          |
| 20023 | Burkitt's tumor or lymphoma, intra-abdominal lymph nodes                        |
| 20024 | Burkitt's tumor or lymphoma, lymph nodes of axilla and upper limb               |
| 20025 | Burkitt's tumor or lymphoma, lymph nodes of inguinal region and lower limb      |
| 20026 | Burkitt's tumor or lymphoma, intrapelvic lymph nodes                            |
| 20027 | Burkitt's tumor or lymphoma, spleen                                             |
| 20028 | Burkitt's tumor or lymphoma, lymph nodes of multiple sites                      |
| 20030 | Marginal zone lymphoma, unspecified site, extranodal and solid organ sites      |
| 20031 | Marginal zone lymphoma, lymph nodes of head, face, and neck                     |
| 20032 | Marginal zone lymphoma, intrathoracic lymph nodes                               |
| 20033 | Marginal zone lymphoma, intraabdominal lymph nodes                              |
| 20034 | Marginal zone lymphoma, lymph nodes of axilla and upper limb                    |
| 20035 | Marginal zone lymphoma, lymph nodes of inguinal region and lower limb           |
| 20036 | Marginal zone lymphoma, intrapelvic lymph nodes                                 |
| 20037 | Marginal zone lymphoma, spleen                                                  |
| 20038 | Marginal zone lymphoma, lymph nodes of multiple sites                           |
| 20040 | Mantle cell lymphoma, unspecified site, extranodal and solid organ sites        |
| 20041 | Mantle cell lymphoma, lymph nodes of head, face, and neck                       |
|       | Mantle cell lymphoma, intrathoracic lymph nodes                                 |
| 20042 | Mantle cell lymphoma, intra-abdominal lymph nodes                               |
|       | Mantle cell lymphoma, lymph nodes of axilla and upper limb                      |
| 20043 | Mantle cell lymphoma, lymph nodes of inguinal region and lower limb             |
|       | Mantle cell lymphoma, intrapelvic lymph nodes                                   |
| 20044 | Mantle cell lymphoma, spleen                                                    |
|       | Mantle cell lymphoma, lymph nodes of multiple sites                             |

|       |                                                                                             |
|-------|---------------------------------------------------------------------------------------------|
| 20050 | Primary central nervous system lymphoma, unspecified site, extranodal and solid organ sites |
| 20052 | Primary central nervous system lymphoma, intrathoracic lymph nodes                          |
| 20053 | Primary central nervous system lymphoma, intra-abdominal lymph nodes                        |
| 20055 | Primary central nervous system lymphoma, lymph nodes of inguinal region and lower limb      |
| 20056 | Primary central nervous system lymphoma, intrapelvic lymph nodes                            |
| 20057 | Primary central nervous system lymphoma, spleen                                             |
| 20058 | Primary central nervous system lymphoma, lymph nodes of multiple sites                      |
| 20060 | Anaplastic large cell lymphoma, unspecified site, extranodal and solid organ sites          |
| 20061 | Anaplastic large cell lymphoma, lymph nodes of head, face, and neck                         |
| 20062 | Anaplastic large cell lymphoma, intrathoracic lymph nodes                                   |
| 20063 | Anaplastic large cell lymphoma, intra-abdominal lymph nodes                                 |
| 20064 | Anaplastic large cell lymphoma, lymph nodes of axilla and upper limb                        |
| 20065 | Anaplastic large cell lymphoma, lymph nodes of inguinal region and lower limb               |
| 20066 | Anaplastic large cell lymphoma, intrapelvic lymph nodes                                     |
| 20067 | Anaplastic large cell lymphoma, spleen                                                      |
| 20068 | Anaplastic large cell lymphoma, lymph nodes of multiple sites                               |
| 20070 | Large cell lymphoma, unspecified site, extranodal and solid organ sites                     |
| 20071 | Large cell lymphoma, lymph nodes of head, face, and neck                                    |
| 20072 | Large cell lymphoma, intrathoracic lymph nodes                                              |
| 20073 | Large cell lymphoma, intra-abdominal lymph nodes                                            |
| 20074 | Large cell lymphoma, lymph nodes of axilla and upper limb                                   |
| 20075 | Large cell lymphoma, lymph nodes of inguinal region and lower limb                          |
| 20076 | Large cell lymphoma, intrapelvic lymph nodes                                                |
| 20077 | Large cell lymphoma, spleen                                                                 |

|       |                                                                                                               |
|-------|---------------------------------------------------------------------------------------------------------------|
| 20078 | Large cell lymphoma, lymph nodes of multiple sites                                                            |
| 20080 | Other named variants of lymphosarcoma and reticulosarcoma, unspecified site, extranodal and solid organ sites |
| 20081 | Other named variants of lymphosarcoma and reticulosarcoma, lymph nodes of head, face, and neck                |
| 20082 | Other named variants of lymphosarcoma and reticulosarcoma, intrathoracic lymph nodes                          |
| 20083 | Other named variants of lymphosarcoma and reticulosarcoma, intra-abdominal lymph nodes                        |
| 20084 | Other named variants of lymphosarcoma and reticulosarcoma, lymph nodes of axilla and upper limb               |
| 20085 | Other named variants of lymphosarcoma and reticulosarcoma, lymph nodes of inguinal region and lower limb      |
| 20086 | Other named variants of lymphosarcoma and reticulosarcoma, intrapelvic lymph nodes                            |
| 20087 | Other named variants of lymphosarcoma and reticulosarcoma, spleen                                             |
| 20088 | Other named variants of lymphosarcoma and reticulosarcoma, lymph nodes of multiple sites                      |
| 20100 | Hodgkin's paraganuloma, unspecified site, extranodal and solid organ sites                                    |
| 20101 | Hodgkin's paraganuloma, lymph nodes of head, face, and neck                                                   |
| 20102 | Hodgkin's paraganuloma, intrathoracic lymph nodes                                                             |
| 20103 | Hodgkin's paraganuloma, intra-abdominal lymph nodes                                                           |
| 20104 | Hodgkin's paraganuloma, lymph nodes of axilla and upper limb                                                  |
| 20105 | Hodgkin's paraganuloma, lymph nodes of inguinal region and lower limb                                         |
| 20106 | Hodgkin's paraganuloma, intrapelvic lymph nodes                                                               |
| 20107 | Hodgkin's paraganuloma, spleen                                                                                |
| 20108 | Hodgkin's paraganuloma, lymph nodes of multiple sites                                                         |
| 20110 | Hodgkin's granuloma, unspecified site, extranodal and solid organ sites                                       |
| 20120 | Hodgkin's sarcoma, unspecified site, extranodal and solid organ sites                                         |
| 20111 | Hodgkin's granuloma, lymph nodes of head, face, and neck                                                      |
| 20121 | Hodgkin's sarcoma, lymph nodes of head, face, and neck                                                        |
| 20112 | Hodgkin's granuloma, intrathoracic lymph nodes                                                                |
| 20122 | Hodgkin's sarcoma, intrathoracic lymph nodes                                                                  |

|       |                                                                                                             |
|-------|-------------------------------------------------------------------------------------------------------------|
| 20113 | Hodgkin's granuloma, intra-abdominal lymph nodes                                                            |
| 20123 | Hodgkin's sarcoma, intra-abdominal lymph nodes                                                              |
| 20114 | Hodgkin's granuloma, lymph nodes of axilla and upper limb                                                   |
| 20124 | Hodgkin's sarcoma, lymph nodes of axilla and upper limb                                                     |
| 20115 | Hodgkin's granuloma, lymph nodes of inguinal region and lower limb                                          |
| 20125 | Hodgkin's sarcoma, lymph nodes of inguinal region and lower limb                                            |
| 20116 | Hodgkin's granuloma, intrapelvic lymph nodes                                                                |
| 20126 | Hodgkin's sarcoma, intrapelvic lymph nodes                                                                  |
| 20117 | Hodgkin's granuloma, spleen                                                                                 |
| 20127 | Hodgkin's sarcoma, spleen                                                                                   |
| 20118 | Hodgkin's granuloma, lymph nodes of multiple sites                                                          |
| 20128 | Hodgkin's sarcoma, lymph nodes of multiple sites                                                            |
| 20140 | Hodgkin's disease, lymphocytic-histiocytic predominance, unspecified site, extranodal and solid organ sites |
| 20141 | Hodgkin's disease, lymphocytic-histiocytic predominance, lymph nodes of head, face, and neck                |
| 20142 | Hodgkin's disease, lymphocytic-histiocytic predominance, intrathoracic lymph nodes                          |
| 20143 | Hodgkin's disease, lymphocytic-histiocytic predominance, intra-abdominal lymph nodes                        |
| 20144 | Hodgkin's disease, lymphocytic-histiocytic predominance, lymph nodes of axilla and upper limb               |
| 20145 | Hodgkin's disease, lymphocytic-histiocytic predominance, lymph nodes of inguinal region and lower limb      |
| 20146 | Hodgkin's disease, lymphocytic-histiocytic predominance, intrapelvic lymph nodes                            |
| 20147 | Hodgkin's disease, lymphocytic-histiocytic predominance, spleen                                             |
| 20148 | Hodgkin's disease, lymphocytic-histiocytic predominance, lymph nodes of multiple sites                      |
| 20150 | Hodgkin's disease, nodular sclerosis, unspecified site, extranodal and solid organ sites                    |
| 20151 | Hodgkin's disease, nodular sclerosis, lymph nodes of head, face, and neck                                   |
| 20152 | Hodgkin's disease, nodular sclerosis, intrathoracic lymph nodes                                             |
| 20153 | Hodgkin's disease, nodular sclerosis, intra-abdominal lymph nodes                                           |

|       |                                                                                              |
|-------|----------------------------------------------------------------------------------------------|
| 20154 | Hodgkin's disease, nodular sclerosis, lymph nodes of axilla and upper limb                   |
| 20155 | Hodgkin's disease, nodular sclerosis, lymph nodes of inguinal region and lower limb          |
| 20156 | Hodgkin's disease, nodular sclerosis, intrapelvic lymph nodes                                |
| 20157 | Hodgkin's disease, nodular sclerosis, spleen                                                 |
| 20158 | Hodgkin's disease, nodular sclerosis, lymph nodes of multiple sites                          |
| 20160 | Hodgkin's disease, mixed cellularity, unspecified site, extranodal and solid organ sites     |
| 20161 | Hodgkin's disease, mixed cellularity, lymph nodes of head, face, and neck                    |
| 20162 | Hodgkin's disease, mixed cellularity, intrathoracic lymph nodes                              |
| 20163 | Hodgkin's disease, mixed cellularity, intra-abdominal lymph nodes                            |
| 20164 | Hodgkin's disease, mixed cellularity, lymph nodes of axilla and upper limb                   |
| 20165 | Hodgkin's disease, mixed cellularity, lymph nodes of inguinal region and lower limb          |
| 20166 | Hodgkin's disease, mixed cellularity, intrapelvic lymph nodes                                |
| 20167 | Hodgkin's disease, mixed cellularity, spleen                                                 |
| 20168 | Hodgkin's disease, mixed cellularity, lymph nodes of multiple sites                          |
| 20170 | Hodgkin's disease, lymphocytic depletion, unspecified site, extranodal and solid organ sites |
| 20171 | Hodgkin's disease, lymphocytic depletion, lymph nodes of head, face, and neck                |
| 20172 | Hodgkin's disease, lymphocytic depletion, intrathoracic lymph nodes                          |
| 20173 | Hodgkin's disease, lymphocytic depletion, intra-abdominal lymph nodes                        |
| 20174 | Hodgkin's disease, lymphocytic depletion, lymph nodes of axilla and upper limb               |
| 20175 | Hodgkin's disease, lymphocytic depletion, lymph nodes of inguinal region and lower limb      |
| 20176 | Hodgkin's disease, lymphocytic depletion, intrapelvic lymph nodes                            |
| 20177 | Hodgkin's disease, lymphocytic depletion, spleen                                             |

|       |                                                                                         |
|-------|-----------------------------------------------------------------------------------------|
| 20178 | Hodgkin's disease, lymphocytic depletion, lymph nodes of multiple sites                 |
| 20190 | Hodgkin's disease, unspecified type, unspecified site, extranodal and solid organ sites |
| 20191 | Hodgkin's disease, unspecified type, lymph nodes of head, face, and neck                |
| 20192 | Hodgkin's disease, unspecified type, intrathoracic lymph nodes                          |
| 20193 | Hodgkin's disease, unspecified type, intra-abdominal lymph nodes                        |
| 20194 | Hodgkin's disease, unspecified type, lymph nodes of axilla and upper limb               |
| 20195 | Hodgkin's disease, unspecified type, lymph nodes of inguinal region and lower limb      |
| 20196 | Hodgkin's disease, unspecified type, intrapelvic lymph nodes                            |
| 20197 | Hodgkin's disease, unspecified type, spleen                                             |
| 20198 | Hodgkin's disease, unspecified type, lymph nodes of multiple sites                      |
| 20200 | Nodular lymphoma, unspecified site, extranodal and solid organ sites                    |
| 20201 | Nodular lymphoma, lymph nodes of head, face, and nec                                    |
| 20202 | Nodular lymphoma, intrathoracic lymph nodes                                             |
| 20203 | Nodular lymphoma, intra-abdominal lymph nodes                                           |
| 20204 | Nodular lymphoma, lymph nodes of axilla and upper limb                                  |
| 20205 | Nodular lymphoma, lymph nodes of inguinal region and lower limb                         |
| 20206 | Nodular lymphoma, intrapelvic lymph nodes                                               |
| 20207 | Nodular lymphoma, spleen                                                                |
| 20208 | Nodular lymphoma, lymph nodes of multiple sites                                         |
| 20210 | Mycosis fungoides, unspecified site, extranodal and solid organ sites                   |
| 20211 | Mycosis fungoides, lymph nodes of head, face, and neck                                  |
| 20212 | Mycosis fungoides, intrathoracic lymph nodes                                            |
| 20213 | Mycosis fungoides, intra-abdominal lymph nodes                                          |
| 20214 | Mycosis fungoides, lymph nodes of axilla and upper limb                                 |
| 20215 | Mycosis fungoides, lymph nodes of inguinal region and lower limb                        |
| 20216 | Mycosis fungoides, intrapelvic lymph nodes                                              |
| 20217 | Mycosis fungoides, spleen                                                               |

|       |                                                                             |
|-------|-----------------------------------------------------------------------------|
| 20218 | Mycosis fungoides, lymph nodes of multiple sites                            |
| 20220 | Sezary's disease, unspecified site, extranodal and solid organ sites        |
| 20221 | Sezary's disease, lymph nodes of head, face, and neck                       |
| 20222 | Sezary's disease, intrathoracic lymph nodes                                 |
| 20223 | Sezary's disease, intra-abdominal lymph nodes                               |
| 20224 | Sezary's disease, lymph nodes of axilla and upper limb                      |
| 20225 | Sezary's disease, lymph nodes of inguinal region and lower limb             |
| 20226 | Sezary's disease, intrapelvic lymph nodes                                   |
| 20227 | Sezary's disease, spleen                                                    |
| 20228 | Sezary's disease, lymph nodes of multiple sites                             |
| 20230 | Malignant histiocytosis, unspecified site, extranodal and solid organ sites |
| 20231 | Malignant histiocytosis, lymph nodes of head, face, and neck                |
| 20232 | Malignant histiocytosis, intrathoracic lymph nodes                          |
| 20233 | Malignant histiocytosis, intra-abdominal lymph nodes                        |
| 20234 | Malignant histiocytosis, lymph nodes of axilla and upper limb               |
| 20235 | Malignant histiocytosis, lymph nodes of inguinal region and lower limb      |
| 20236 | Malignant histiocytosis, intrapelvic lymph nodes                            |
| 20237 | Malignant histiocytosis, spleen                                             |
| 20238 | Malignant histiocytosis, lymph nodes of multiple sites                      |
| 20250 | Letterer-siwe disease, unspecified site, extranodal and solid organ sites   |
| 20251 | Letterer-siwe disease, lymph nodes of head, face, and neck                  |
| 20252 | Letterer-siwe disease, intrathoracic lymph nodes                            |
| 20253 | Letterer-siwe disease, intra-abdominal lymph nodes                          |
| 20254 | Letterer-siwe disease, lymph nodes of axilla and upper limb                 |
| 20255 | Letterer-siwe disease, lymph nodes of inguinal region and lower limb        |
| 20256 | Letterer-siwe disease, intrapelvic lymph nodes                              |
| 20257 | Letterer-siwe disease, spleen                                               |

|       |                                                                                |
|-------|--------------------------------------------------------------------------------|
| 20258 | Letterer-siwe disease, lymph nodes of multiple sites                           |
| 20260 | Malignant mast cell tumors, unspecified site, extranodal and solid organ sites |
| 20261 | Malignant mast cell tumors, lymph nodes of head, face, and neck                |
| 20262 | Malignant mast cell tumors, intrathoracic lymph nodes                          |
| 20263 | Malignant mast cell tumors, intra-abdominal lymph nodes                        |
| 20264 | Malignant mast cell tumors, lymph nodes of axilla and upper limb               |
| 20265 | Malignant mast cell tumors, lymph nodes of inguinal region and lower limb      |
| 20266 | Malignant mast cell tumors, intrapelvic lymph nodes                            |
| 20267 | Malignant mast cell tumors, spleen                                             |
| 20268 | Malignant mast cell tumors, lymph nodes of multiple sites                      |
| 20270 | Peripheral T cell lymphoma, unspecified site, extranodal and solid organ sites |
| 20271 | Peripheral T cell lymphoma, lymph nodes of head, face, and neck                |
| 20272 | Peripheral T cell lymphoma, intrathoracic lymph nodes                          |
| 20273 | Peripheral T cell lymphoma, intra-abdominal lymph nodes                        |
| 20274 | Peripheral T cell lymphoma, lymph nodes of axilla and upper limb               |
| 20275 | Peripheral T cell lymphoma, lymph nodes of inguinal region and lower limb      |
| 20276 | Peripheral T cell lymphoma, intrapelvic lymph nodes                            |
| 20277 | Peripheral T cell lymphoma, spleen                                             |
| 20278 | Peripheral T cell lymphoma, lymph nodes of multiple sites                      |
| 20280 | Other malignant lymphomas, unspecified site, extranodal and solid organ sites  |
| 20281 | Other malignant lymphomas, lymph nodes of head, face, and neck                 |
| 20282 | Other malignant lymphomas, intrathoracic lymph nodes                           |
| 20283 | Other malignant lymphomas, intra-abdominal lymph nodes                         |



|       |                                                                                                                                  |
|-------|----------------------------------------------------------------------------------------------------------------------------------|
| 20284 | Other malignant lymphomas, lymph nodes of axilla and upper limb                                                                  |
| 20285 | Other malignant lymphomas, lymph nodes of inguinal region and lower limb                                                         |
| 20286 | Other malignant lymphomas, intrapelvic lymph nodes                                                                               |
| 20287 | Other malignant lymphomas, spleen                                                                                                |
| 20288 | Other malignant lymphomas, lymph nodes of multiple sites                                                                         |
| 20290 | Other and unspecified malignant neoplasms of lymphoid and histiocytic tissue, unspecified site, extranodal and solid organ sites |
| 20292 | Other and unspecified malignant neoplasms of lymphoid and histiocytic tissue, intrathoracic lymph nodes                          |
| 20293 | Other and unspecified malignant neoplasms of lymphoid and histiocytic tissue, intra-abdominal lymph nodes                        |
| 20294 | Other and unspecified malignant neoplasms of lymphoid and histiocytic tissue, lymph nodes of axilla and upper limb               |
| 20295 | Other and unspecified malignant neoplasms of lymphoid and histiocytic tissue, lymph nodes of inguinal region and lower limb      |
| 20296 | Other and unspecified malignant neoplasms of lymphoid and histiocytic tissue, intrapelvic lymph nodes                            |
| 20297 | Other and unspecified malignant neoplasms of lymphoid and histiocytic tissue, spleen                                             |
| 20298 | Other and unspecified malignant neoplasms of lymphoid and histiocytic tissue, lymph nodes of multiple sites                      |
| 20300 | Multiple myeloma, without mention of having achieved remission                                                                   |
| 20301 | Multiple myeloma, in remission                                                                                                   |
| 20302 | Multiple myeloma, in relapse                                                                                                     |
| 20380 | Other immunoproliferative neoplasms, without mention of having achieved remission                                                |
| 20381 | Other immunoproliferative neoplasms, in remission                                                                                |
| 20382 | Other immunoproliferative neoplasms, in relapse                                                                                  |
| 2386  | Neoplasm of uncertain behavior of plasma cells                                                                                   |
| 2733  | Macroglobulinemia                                                                                                                |
| V1071 | Personal history of lymphosarcoma and reticulosarcoma                                                                            |
| V1072 | Personal history of hodgkin's disease                                                                                            |

|  |       |                                                                 |
|--|-------|-----------------------------------------------------------------|
|  | V1079 | Personal history of other lymphatic and hematopoietic neoplasms |
|--|-------|-----------------------------------------------------------------|

| Metastatic Disease | ICD9 | ICD9 Description                                                                              |
|--------------------|------|-----------------------------------------------------------------------------------------------|
|                    | 1960 | Secondary and unspecified malignant neoplasm of lymph nodes of head, face, and neck           |
|                    | 1961 | Secondary and unspecified malignant neoplasm of intrathoracic lymph nodes                     |
|                    | 1962 | Secondary and unspecified malignant neoplasm of intra-abdominal lymph nodes                   |
|                    | 1963 | Secondary and unspecified malignant neoplasm of lymph nodes of axilla and upper limb          |
|                    | 1965 | Secondary and unspecified malignant neoplasm of lymph nodes of inguinal region and lower limb |
|                    | 1966 | Secondary and unspecified malignant neoplasm of intrapelvic lymph nodes                       |
|                    | 1968 | Secondary and unspecified malignant neoplasm of lymph nodes of multiple sites                 |
|                    | 1969 | Secondary and unspecified malignant neoplasm of lymph nodes, site unspecified                 |
|                    | 1970 | Secondary malignant neoplasm of lung                                                          |
|                    | 1971 | Secondary malignant neoplasm of mediastinum                                                   |
|                    | 1972 | Secondary malignant neoplasm of pleura                                                        |
|                    | 1973 | Secondary malignant neoplasm of other respiratory organs                                      |
|                    | 1974 | Secondary malignant neoplasm of small intestine including duodenum                            |
|                    | 1975 | Secondary malignant neoplasm of large intestine and rectum                                    |
|                    | 1976 | Secondary malignant neoplasm of retroperitoneum and peritoneum                                |
|                    | 1977 | Malignant neoplasm of liver, secondary                                                        |
|                    | 1978 | Secondary malignant neoplasm of other digestive organs and spleen                             |
|                    | 1980 | Secondary malignant neoplasm of kidney                                                        |
|                    | 1981 | Secondary malignant neoplasm of other urinary organs                                          |
|                    | 1982 | Secondary malignant neoplasm of skin                                                          |
|                    | 1983 | Secondary malignant neoplasm of brain and spinal cord                                         |
|                    | 1984 | Secondary malignant neoplasm of other parts of nervous system                                 |

|       |                                                               |
|-------|---------------------------------------------------------------|
| 1985  | Secondary malignant neoplasm of bone and bone marrow          |
| 1986  | Secondary malignant neoplasm of ovary                         |
| 1987  | Secondary malignant neoplasm of adrenal gland                 |
| 19881 | Secondary malignant neoplasm of breast                        |
| 19882 | Secondary malignant neoplasm of genital organs                |
| 19889 | Secondary malignant neoplasm of other specified sites         |
| 1990  | Disseminated malignant neoplasm without specification of site |
| 1991  | Other malignant neoplasm without specification of site        |
| 1992  | Malignant neoplasm associated with transplant organ           |

| Solid Tumor | ICD9 | ICD9 Description                                                      |
|-------------|------|-----------------------------------------------------------------------|
|             | 1400 | Malignant neoplasm of upper lip, vermilion border                     |
|             | 1401 | Malignant neoplasm of lower lip, vermilion border                     |
|             | 1402 | Malignant neoplasm of upper lip, inner aspect                         |
|             | 1404 | Malignant neoplasm of lower lip, inner aspect                         |
|             | 1405 | Malignant neoplasm of lip, unspecified, inner aspect                  |
|             | 1406 | Malignant neoplasm of commissure of lip                               |
|             | 1408 | Malignant neoplasm of other sites of lip                              |
|             | 1409 | Malignant neoplasm of lip, unspecified, vermilion border              |
|             | 1410 | Malignant neoplasm of base of tongue                                  |
|             | 1411 | Malignant neoplasm of dorsal surface of tongue                        |
|             | 1412 | Malignant neoplasm of tip and lateral border of tongue                |
|             | 1413 | Malignant neoplasm of ventral surface of tongue                       |
|             | 1414 | Malignant neoplasm of anterior two-thirds of tongue, part unspecified |
|             | 1415 | Malignant neoplasm of junctional zone of tongue                       |
|             | 1416 | Malignant neoplasm of lingual tonsil                                  |
|             | 1418 | Malignant neoplasm of other sites of tongue                           |
|             | 1419 | Malignant neoplasm of tongue, unspecified                             |
|             | 1420 | Malignant neoplasm of parotid gland                                   |
|             | 1421 | Malignant neoplasm of submandibular gland                             |
|             | 1422 | Malignant neoplasm of sublingual gland                                |
|             | 1428 | Malignant neoplasm of other major salivary glands                     |
|             | 1429 | Malignant neoplasm of salivary gland, unspecified                     |
|             | 1430 | Malignant neoplasm of upper gum                                       |
|             | 1431 | Malignant neoplasm of lower gum                                       |
|             | 1438 | Malignant neoplasm of other sites of gum                              |
|             | 1439 | Malignant neoplasm of gum, unspecified                                |

|      |                                                                 |
|------|-----------------------------------------------------------------|
| 1440 | Malignant neoplasm of anterior portion of floor of mouth        |
| 1441 | Malignant neoplasm of lateral portion of floor of mouth         |
| 1448 | Malignant neoplasm of other sites of floor of mouth             |
| 1449 | Malignant neoplasm of floor of mouth, part unspecified          |
| 1450 | Malignant neoplasm of cheek mucosa                              |
| 1451 | Malignant neoplasm of vestibule of mouth                        |
| 1451 | Malignant neoplasm of hard palate                               |
| 1451 | Malignant neoplasm of soft palat                                |
| 1451 | Malignant neoplasm of uvula                                     |
| 1451 | Malignant neoplasm of palate, unspecified                       |
| 1451 | Malignant neoplasm of retromolar area                           |
| 1458 | Malignant neoplasm of other specified parts of mouth            |
| 1459 | Malignant neoplasm of mouth, unspecified                        |
| 1460 | Malignant neoplasm of tonsil                                    |
| 1461 | Malignant neoplasm of tonsillar fossa                           |
| 1462 | Malignant neoplasm of tonsillar pillars (anterior) (posterior)  |
| 1463 | Malignant neoplasm of vallecula epiglottica                     |
| 1464 | Malignant neoplasm of anterior aspect of epiglottis             |
| 1465 | Malignant neoplasm of junctional region of oropharynx           |
| 1466 | Malignant neoplasm of lateral wall of oropharynx                |
| 1467 | Malignant neoplasm of posterior wall of oropharynx              |
| 1468 | Malignant neoplasm of other specified sites of oropharynx       |
| 1469 | Malignant neoplasm of oropharynx, unspecified site              |
| 1470 | Malignant neoplasm of superior wall of nasopharynx              |
| 1470 | Malignant neoplasm of posterior wall of nasopharynx             |
| 1470 | Malignant neoplasm of lateral wall of nasopharynx               |
| 1470 | Malignant neoplasm of anterior wall of nasopharynx              |
| 1478 | Malignant neoplasm of other specified sites of nasopharynx      |
| 1479 | Malignant neoplasm of nasopharynx, unspecified site             |
| 1480 | Malignant neoplasm of postcricoid region of hypopharynx         |
| 1481 | Malignant neoplasm of pyriform sinus                            |
| 1482 | Malignant neoplasm of aryepiglottic fold, hypopharyngeal aspect |
| 1483 | Malignant neoplasm of posterior hypopharyngeal wall             |
| 1488 | Malignant neoplasm of other specified sites of hypopharynx      |
| 1489 | Malignant neoplasm of hypopharynx, unspecified site             |
| 1490 | Malignant neoplasm of pharynx, unspecified                      |
| 1491 | Malignant neoplasm of waldeyer's ring                           |

|      |                                                                        |
|------|------------------------------------------------------------------------|
| 1498 | Malignant neoplasm of other sites within the lip and oral cavity       |
| 1499 | Malignant neoplasm of ill-defined sites within the lip and oral cavity |
| 1500 | Malignant neoplasm of cervical esophagus                               |
| 1503 | Malignant neoplasm of upper third of esophagus                         |
| 1501 | Malignant neoplasm of thoracic esophagus                               |
| 1504 | Malignant neoplasm of middle third of esophagus                        |
| 1502 | Malignant neoplasm of abdominal esophagus                              |
| 1505 | Malignant neoplasm of lower third of esophagus                         |
| 1508 | Malignant neoplasm of other specified part of esophagus                |
| 1509 | Malignant neoplasm of esophagus, unspecified site                      |
| 1510 | Malignant neoplasm of cardia                                           |
| 1511 | Malignant neoplasm of pylorus                                          |
| 1512 | Malignant neoplasm of pyloric antrum                                   |
| 1513 | Malignant neoplasm of fundus of stomach                                |
| 1514 | Malignant neoplasm of body of stomach                                  |
| 1515 | Malignant neoplasm of lesser curvature of stomach, unspecified         |
| 1516 | Malignant neoplasm of greater curvature of stomach, unspecified        |
| 1518 | Malignant neoplasm of other specified sites of stomach                 |
| 1519 | Malignant neoplasm of stomach, unspecified site                        |
| 1520 | Malignant neoplasm of duodenum                                         |
| 1521 | Malignant neoplasm of jejunum                                          |
| 1522 | Malignant neoplasm of ileum                                            |
| 1523 | Malignant neoplasm of Meckel's diverticulum                            |
| 1528 | Malignant neoplasm of other specified sites of small intestine         |
| 1529 | Malignant neoplasm of small intestine, unspecified site                |
| 1530 | Malignant neoplasm of hepatic flexure                                  |
| 1531 | Malignant neoplasm of transverse colon                                 |
| 1532 | Malignant neoplasm of descending colon                                 |
| 1533 | Malignant neoplasm of sigmoid colon                                    |
| 1534 | Malignant neoplasm of cecum                                            |
| 1535 | Malignant neoplasm of appendix vermiformis                             |
| 1536 | Malignant neoplasm of ascending colon                                  |
| 1537 | Malignant neoplasm of splenic flexure                                  |
| 1538 | Malignant neoplasm of other specified sites of large intestine         |
| 1539 | Malignant neoplasm of colon, unspecified site                          |

|      |                                                                                        |
|------|----------------------------------------------------------------------------------------|
| 1540 | Malignant neoplasm of rectosigmoid junction                                            |
| 1541 | Malignant neoplasm of rectum                                                           |
| 1542 | Malignant neoplasm of anal canal                                                       |
| 1543 | Malignant neoplasm of anus, unspecified site                                           |
| 1548 | Malignant neoplasm of other sites of rectum, rectosigmoid junction, and anus           |
| 1550 | Malignant neoplasm of liver, primary                                                   |
| 1551 | Malignant neoplasm of intrahepatic bile ducts                                          |
| 1552 | Malignant neoplasm of liver, not specified as primary or secondary                     |
| 1560 | Malignant neoplasm of gallbladder                                                      |
| 1561 | Malignant neoplasm of extrahepatic bile ducts                                          |
| 1562 | Malignant neoplasm of ampulla of vater                                                 |
| 1568 | Malignant neoplasm of other specified sites of gallbladder and extrahepatic bile ducts |
| 1569 | Malignant neoplasm of biliary tract, part unspecified site                             |
| 1570 | Malignant neoplasm of head of pancreas                                                 |
| 1571 | Malignant neoplasm of body of pancreas                                                 |
| 1572 | Malignant neoplasm of tail of pancreas                                                 |
| 1573 | Malignant neoplasm of pancreatic duct                                                  |
| 1574 | Malignant neoplasm of islets of langerhans                                             |
| 1578 | Malignant neoplasm of other specified sites of pancreas                                |
| 1579 | Malignant neoplasm of pancreas, part unspecified                                       |
| 1580 | Malignant neoplasm of retroperitoneum                                                  |
| 1588 | Malignant neoplasm of specified parts of peritoneum                                    |
| 1589 | Malignant neoplasm of peritoneum, unspecified                                          |
| 1590 | Malignant neoplasm of intestinal tract, part unspecified                               |
| 1591 | Malignant neoplasm of spleen, not elsewhere classified                                 |
| 1598 | Malignant neoplasm of other sites of digestive system and intra-abdominal organs       |
| 1599 | Malignant neoplasm of ill-defined sites within the digestive organs and peritoneum     |
| 1600 | Malignant neoplasm of nasal cavities                                                   |
| 1601 | Malignant neoplasm of auditory tube, middle ear, and mastoid air cells                 |
| 1602 | Malignant neoplasm of maxillary sinus                                                  |
| 1603 | Malignant neoplasm of ethmoidal sinus                                                  |

|      |                                                                                          |
|------|------------------------------------------------------------------------------------------|
| 1604 | Malignant neoplasm of frontal sinus                                                      |
| 1605 | Malignant neoplasm of sphenoidal sinus                                                   |
| 1608 | Malignant neoplasm of other accessory sinuses                                            |
| 1609 | Malignant neoplasm of accessory sinus, unspecified                                       |
| 1610 | Malignant neoplasm of glottis                                                            |
| 1611 | Malignant neoplasm of supraglottis                                                       |
| 1612 | Malignant neoplasm of subglottis                                                         |
| 1613 | Malignant neoplasm of laryngeal cartilages                                               |
| 1618 | Malignant neoplasm of other specified sites of larynx                                    |
| 1619 | Malignant neoplasm of larynx, unspecified                                                |
| 1620 | Malignant neoplasm of trachea                                                            |
| 1622 | Malignant neoplasm of main bronchus                                                      |
| 1623 | Malignant neoplasm of upper lobe, bronchus or lung                                       |
| 1624 | Malignant neoplasm of middle lobe, bronchus or lung                                      |
| 1625 | Malignant neoplasm of lower lobe, bronchus or lung                                       |
| 1628 | Malignant neoplasm of other parts of bronchus or lung                                    |
| 1629 | Malignant neoplasm of bronchus and lung, unspecified                                     |
| 1630 | Malignant neoplasm of parietal pleura                                                    |
| 1631 | Malignant neoplasm of visceral pleura                                                    |
| 1638 | Malignant neoplasm of other specified sites of pleura                                    |
| 1639 | Malignant neoplasm of pleura, unspecified                                                |
| 1640 | Malignant neoplasm of thymus                                                             |
| 1641 | Malignant neoplasm of heart                                                              |
| 1642 | Malignant neoplasm of anterior mediastinum                                               |
| 1642 | Malignant neoplasm of posterior mediastinum                                              |
| 1648 | Malignant neoplasm of other parts of mediastinum                                         |
| 1649 | Malignant neoplasm of mediastinum, part unspecified                                      |
| 1650 | Malignant neoplasm of upper respiratory tract, part unspecified                          |
| 1658 | Malignant neoplasm of other sites within the respiratory system and intrathoracic organs |
| 1659 | Malignant neoplasm of ill-defined sites within the respiratory system                    |

|      |                                                                                          |
|------|------------------------------------------------------------------------------------------|
| 1700 | Malignant neoplasm of bones of skull and face, except mandible                           |
| 1701 | Malignant neoplasm of mandible                                                           |
| 1702 | Malignant neoplasm of vertebral column, excluding sacrum and coccyx                      |
| 1703 | Malignant neoplasm of ribs, sternum, and clavicle                                        |
| 1704 | Malignant neoplasm of scapula and long bones of upper limb                               |
| 1705 | Malignant neoplasm of short bones of upper limb                                          |
| 1706 | Malignant neoplasm of pelvic bones, sacrum, and coccyx                                   |
| 1707 | Malignant neoplasm of long bones of lower limb                                           |
| 1708 | Malignant neoplasm of short bones of lower limb                                          |
| 1709 | Malignant neoplasm of bone and articular cartilage, site unspecified                     |
| 1710 | Malignant neoplasm of connective and other soft tissue of head, face, and neck           |
| 1712 | Malignant neoplasm of connective and other soft tissue of upper limb, including shoulder |
| 1713 | Malignant neoplasm of connective and other soft tissue of lower limb, including hip      |
| 1714 | Malignant neoplasm of connective and other soft tissue of thorax                         |
| 1715 | Malignant neoplasm of connective and other soft tissue of abdomen                        |
| 1716 | Malignant neoplasm of connective and other soft tissue of pelvis                         |
| 1717 | Malignant neoplasm of connective and other soft tissue of trunk, unspecified             |
| 1718 | Malignant neoplasm of other specified sites of connective and other soft tissue          |
| 1719 | Malignant neoplasm of connective and other soft tissue, site unspecified                 |
| 1720 | Malignant melanoma of skin of lip                                                        |
| 1721 | Malignant melanoma of skin of eyelid, including canthus                                  |
| 1723 | Malignant melanoma of skin of other and unspecified parts of face                        |
| 1724 | Malignant melanoma of skin of scalp and neck                                             |
| 1725 | Malignant melanoma of skin of trunk, except scrotum                                      |
| 1727 | Malignant melanoma of skin of lower limb, including hip                                  |
| 1728 | Malignant melanoma of other specified sites of skin                                      |
| 1729 | Melanoma of skin, site unspecified                                                       |
| 1740 | Malignant neoplasm of nipple and areola of female breast                                 |



|      |                                                                  |
|------|------------------------------------------------------------------|
| 1741 | Malignant neoplasm of central portion of female breast           |
| 1742 | Malignant neoplasm of upper-inner quadrant of female breast      |
| 1743 | Malignant neoplasm of lower-inner quadrant of female breast      |
| 1744 | Malignant neoplasm of upper-outer quadrant of female breast      |
| 1745 | Malignant neoplasm of lower-outer quadrant of female breast      |
| 1746 | Malignant neoplasm of axillary tail of female breast             |
| 1748 | Malignant neoplasm of other specified sites of female breast     |
| 1749 | Malignant neoplasm of breast (female), unspecified               |
| 1750 | Malignant neoplasm of nipple and areola of male breast           |
| 1759 | Malignant neoplasm of other and unspecified sites of male breast |
| 179  | Malignant neoplasm of uterus, part unspecified                   |
| 1800 | Malignant neoplasm of endocervix                                 |
| 1801 | Malignant neoplasm of exocervix                                  |
| 1808 | Malignant neoplasm of other specified sites of cervix            |
| 1809 | Malignant neoplasm of cervix uteri, unspecified site             |
| 181  | Malignant neoplasm of placenta                                   |
| 1820 | Malignant neoplasm of corpus uteri, except isthmus               |
| 1821 | Malignant neoplasm of isthmus                                    |
| 1828 | Malignant neoplasm of other specified sites of body of uterus    |
| 1830 | Malignant neoplasm of ovary                                      |
| 1832 | Malignant neoplasm of fallopian tube                             |
| 1833 | Malignant neoplasm of broad ligament of uterus                   |
| 1834 | Malignant neoplasm of parametrium                                |
| 1835 | Malignant neoplasm of round ligament of uterus                   |
| 1838 | Malignant neoplasm of other specified sites of uterine adnexa    |
| 1839 | Malignant neoplasm of uterine adnexa, unspecified site           |
| 1840 | Malignant neoplasm of vagina                                     |
| 1841 | Malignant neoplasm of labia majora                               |

|      |                                                                                |
|------|--------------------------------------------------------------------------------|
| 1842 | Malignant neoplasm of labia minora                                             |
| 1843 | Malignant neoplasm of clitoris                                                 |
| 1844 | Malignant neoplasm of vulva, unspecified site                                  |
| 1848 | Malignant neoplasm of other specified sites of female genital organs           |
| 1849 | Malignant neoplasm of female genital organ, site unspecified                   |
| 185  | Malignant neoplasm of prostate                                                 |
| 1860 | Malignant neoplasm of undescended testis                                       |
| 1869 | Malignant neoplasm of other and unspecified testis                             |
| 1871 | Malignant neoplasm of prepuce                                                  |
| 1872 | Malignant neoplasm of glans penis                                              |
| 1873 | Malignant neoplasm of body of penis                                            |
| 1874 | Malignant neoplasm of penis, part unspecified                                  |
| 1875 | Malignant neoplasm of epididymis                                               |
| 1876 | Malignant neoplasm of spermatic cord                                           |
| 1877 | Malignant neoplasm of scrotum                                                  |
| 1878 | Malignant neoplasm of other specified sites of male genital organs             |
| 1879 | Malignant neoplasm of male genital organ, site unspecified                     |
| 1880 | Malignant neoplasm of trigone of urinary bladder                               |
| 1881 | Malignant neoplasm of dome of urinary bladder                                  |
| 1882 | Malignant neoplasm of lateral wall of urinary bladder                          |
| 1883 | Malignant neoplasm of anterior wall of urinary bladder                         |
| 1884 | Malignant neoplasm of posterior wall of urinary bladder                        |
| 1885 | Malignant neoplasm of bladder neck                                             |
| 1886 | Malignant neoplasm of ureteric orifice                                         |
| 1887 | Malignant neoplasm of urachus                                                  |
| 1888 | Malignant neoplasm of other specified sites of bladder                         |
| 1889 | Malignant neoplasm of bladder, part unspecified                                |
| 1890 | Malignant neoplasm of kidney, except pelvis                                    |
| 1891 | Malignant neoplasm of renal pelvis                                             |
| 1892 | Malignant neoplasm of ureter                                                   |
| 1893 | Malignant neoplasm of urethra                                                  |
| 1894 | Malignant neoplasm of paraurethral glands                                      |
| 1898 | Malignant neoplasm of other specified sites of urinary organs                  |
| 1899 | Malignant neoplasm of urinary organ, site unspecified                          |
| 1900 | Malignant neoplasm of eyeball, except conjunctiva, cornea, retina, and choroid |
| 1901 | Malignant neoplasm of orbit                                                    |

|      |                                                                     |
|------|---------------------------------------------------------------------|
| 1902 | Malignant neoplasm of lacrimal gland                                |
| 1903 | Malignant neoplasm of conjunctiva                                   |
| 1904 | Malignant neoplasm of cornea                                        |
| 1905 | Malignant neoplasm of retina                                        |
| 1906 | Malignant neoplasm of choroid                                       |
| 1907 | Malignant neoplasm of lacrimal duct                                 |
| 1908 | Malignant neoplasm of other specified sites of eye                  |
| 1909 | Malignant neoplasm of eye, part unspecified                         |
| 1910 | Malignant neoplasm of cerebrum, except lobes and ventricles         |
| 1911 | Malignant neoplasm of frontal lobe                                  |
| 1912 | Malignant neoplasm of temporal lobe                                 |
| 1913 | Malignant neoplasm of parietal lobe                                 |
| 1914 | Malignant neoplasm of occipital lobe                                |
| 1915 | Malignant neoplasm of ventricles                                    |
| 1916 | Malignant neoplasm of cerebellum nos                                |
| 1917 | Malignant neoplasm of brain stem                                    |
| 1918 | Malignant neoplasm of other parts of brain                          |
| 1919 | Malignant neoplasm of brain, unspecified                            |
| 1920 | Malignant neoplasm of cranial nerves                                |
| 1921 | Malignant neoplasm of cerebral meninge                              |
| 1922 | Malignant neoplasm of spinal cord                                   |
| 1923 | Malignant neoplasm of spinal meninges                               |
| 1928 | Malignant neoplasm of other specified sites of nervous system       |
| 1929 | Malignant neoplasm of nervous system, part unspecified              |
| 193  | Malignant neoplasm of thyroid gland                                 |
| 1940 | Malignant neoplasm of adrenal gland                                 |
| 1941 | Malignant neoplasm of parathyroid gland                             |
| 1943 | Malignant neoplasm of pituitary gland and craniopharyngeal duct     |
| 1944 | Malignant neoplasm of pineal gland                                  |
| 1945 | Malignant neoplasm of carotid body                                  |
| 1946 | Malignant neoplasm of aortic body and other paraganglia             |
| 1948 | Malignant neoplasm of other endocrine glands and related structures |
| 1949 | Malignant neoplasm of endocrine gland, site unspecified             |
| 1950 | Malignant neoplasm of head, face, and neck                          |

|       |                                                                                             |
|-------|---------------------------------------------------------------------------------------------|
| 1951  | Malignant neoplasm of thorax                                                                |
| 1952  | Malignant neoplasm of abdomen                                                               |
| 1953  | Malignant neoplasm of pelvis                                                                |
| 1954  | Malignant neoplasm of upper limb                                                            |
| 1955  | Malignant neoplasm of lower limb                                                            |
| 1958  | Malignant neoplasm of other specified sites                                                 |
| V1000 | Personal history of malignant neoplasm of gastrointestinal tract, unspecified               |
| V1001 | Personal history of malignant neoplasm of tongue                                            |
| V1002 | Personal history of malignant neoplasm of other and unspecified oral cavity and pharynx     |
| V1003 | Personal history of malignant neoplasm of esophagus                                         |
| V1004 | Personal history of malignant neoplasm of stomach                                           |
| V1005 | Personal history of malignant neoplasm of large intestine                                   |
| V1006 | Personal history of malignant neoplasm of rectum, rectosigmoid junction, and anus           |
| V1007 | Personal history of malignant neoplasm of liver                                             |
| V1011 | Personal history of malignant neoplasm of bronchus and lung                                 |
| V1012 | Personal history of malignant neoplasm of trachea                                           |
| V1020 | Personal history of malignant neoplasm of respiratory organ, unspecified                    |
| V1021 | Personal history of malignant neoplasm of larynx                                            |
| V1022 | Personal history of malignant neoplasm of nasal cavities, middle ear, and accessory sinuses |
| V1029 | Personal history of malignant neoplasm of other respiratory and intrathoracic organs        |
| V103  | Personal history of malignant neoplasm of breast                                            |
| V1040 | Personal history of malignant neoplasm of female genital organ, unspecified                 |
| V1041 | Personal history of malignant neoplasm of cervix uteri                                      |
| V1042 | Personal history of malignant neoplasm of other parts of uterus                             |
| V1043 | Personal history of malignant neoplasm of ovary                                             |
| V1044 | Personal history of malignant neoplasm of other female genital organs                       |
| V1045 | Personal history of malignant neoplasm of male genital organ, unspecified                   |
| V1046 | Personal history of malignant neoplasm of prostate                                          |
| V1047 | Personal history of malignant neoplasm of testis                                            |
| V1048 | Personal history of malignant neoplasm of epididymis                                        |

|       |                                                                                         |
|-------|-----------------------------------------------------------------------------------------|
| V1049 | Personal history of malignant neoplasm of other male genital organs                     |
| V1050 | Personal history of malignant neoplasm of urinary organ, unspecified                    |
| V1051 | Personal history of malignant neoplasm of bladder                                       |
| V1052 | Personal history of malignant neoplasm of kidney                                        |
| V1053 | Personal history of malignant neoplasm of renal pelvis                                  |
| V1059 | Personal history of malignant neoplasm of other urinary organs                          |
| V1060 | Personal history of leukemia, unspecified                                               |
| V1061 | Personal history of lymphoid leukemia                                                   |
| V1062 | Personal history of myeloid leukemia                                                    |
| V1063 | Personal history of monocytic leukemia                                                  |
| V1069 | Personal history of other leukemia                                                      |
| V1071 | Personal history of lymphosarcoma and reticulosarcoma                                   |
| V1072 | Personal history of hodgkin's disease                                                   |
| V1079 | Personal history of other lymphatic and hematopoietic neoplasms                         |
| V1081 | Personal history of malignant neoplasm of bone                                          |
| V1082 | Personal history of malignant melanoma of skin                                          |
| V1083 | Personal history of other malignant neoplasm of skin                                    |
| V1084 | Personal history of malignant neoplasm of eye                                           |
| V1085 | Personal history of malignant neoplasm of brain                                         |
| V1086 | Personal history of malignant neoplasm of other parts of nervous system                 |
| V1087 | Personal history of malignant neoplasm of thyroid                                       |
| V1088 | Personal history of malignant neoplasm of other endocrine glands and related structures |
| V1089 | Personal history of malignant neoplasm of other sites                                   |
| V1090 | Personal history of unspecified malignant neoplasm                                      |
| V1091 | Personal history of malignant neuroendocrine tumor                                      |

| Arthritis | ICD9 | ICD9 Description                                      |
|-----------|------|-------------------------------------------------------|
|           | 7010 | Circumscribed scleroderma                             |
|           | 7101 | Systemic sclerosis                                    |
|           | 7102 | Sicca syndrom                                         |
|           | 7103 | Dermatomyositis                                       |
|           | 7104 | Polymyositis                                          |
|           | 7105 | Eosinophilia myalgia syndrome                         |
|           | 7108 | Other specified diffuse diseases of connective tissue |

|       |                                                                     |
|-------|---------------------------------------------------------------------|
| 7108  | Unspecified diffuse connective tissue disease                       |
| 7140  | Rheumatoid arthritis                                                |
| 7141  | Felty's syndrome                                                    |
| 7142  | Other rheumatoid arthritis with visceral or systemic involvement    |
| 71430 | Polyarticular juvenile rheumatoid arthritis, chronic or unspecified |
| 71431 | Polyarticular juvenile rheumatoid arthritis, acute                  |
| 71432 | Pauciarticular juvenile rheumatoid arthritis                        |
| 71433 | Monoarticular juvenile rheumatoid arthritis                         |
| 7144  | Chronic post rheumatic arthropathy                                  |
| 71481 | Rheumatoid lung                                                     |
| 71489 | Other specified inflammatory polyarthropathies                      |
| 7149  | Unspecified inflammatory polyarthropathy                            |
| 7200  | Ankylosing spondylitis                                              |
| 7201  | Spinal enthesopathy                                                 |
| 7202  | Sacroiliitis, not elsewhere classified                              |
| 72081 | Inflammatory spondylopathies in diseases classified elsewhere       |
| 72089 | Other inflammatory spondylopathies                                  |
| 7209  | Unspecified inflammatory spondylopathy                              |
| 725   | Polymyalgia rheumatica                                              |

| Coagulopathy | ICD9  | ICD9 Description                                                                                  |
|--------------|-------|---------------------------------------------------------------------------------------------------|
|              | 2860  | Congenital factor VIII disorder                                                                   |
|              | 2861  | Congenital factor IX disorder                                                                     |
|              | 2862  | Congenital factor XI deficiency                                                                   |
|              | 2863  | Congenital deficiency of other clotting factors                                                   |
|              | 2864  | Von Willebrand's disease                                                                          |
|              | 28652 | Acquired hemophilia                                                                               |
|              | 28653 | Antiphospholipid antibody with hemorrhagic disorder                                               |
|              | 28659 | Other hemorrhagic disorder due to intrinsic circulating anticoagulants, antibodies, or inhibitors |
|              | 2866  | Defibrination syndrome                                                                            |
|              | 2869  | Other and unspecified coagulation defects                                                         |
|              | 2871  | Qualitative platelet defects                                                                      |
|              | 28730 | Primary thrombocytopenia,unspecified                                                              |
|              | 28731 | Immune thrombocytopenic purpura                                                                   |
|              | 28732 | Evans' syndrome                                                                                   |

|  |       |                                                    |
|--|-------|----------------------------------------------------|
|  | 28733 | Congenital and hereditary thrombocytopenic purpura |
|  | 28739 | Other primary thrombocytopenia                     |
|  | 28741 | Posttransfusion purpura                            |
|  | 38749 | Other secondary thrombocytopenia                   |
|  | 2875  | Thrombocytopenia, unspecified                      |

|         |             |                                  |
|---------|-------------|----------------------------------|
| Obesity | <b>ICD9</b> | <b>ICD9 Description</b>          |
|         | 27800       | Obesity, unspecified             |
|         | 27801       | Morbid obesity                   |
|         | 27803       | Obesity hypoventilation syndrome |

|             |             |                                                             |
|-------------|-------------|-------------------------------------------------------------|
| Weight Loss | <b>ICD9</b> | <b>ICD9 Description</b>                                     |
|             | 260         | Kwashiorko                                                  |
|             | 261         | Nutritional marasmus                                        |
|             | 262         | Other severe protein-calorie malnutrition                   |
|             | 2630        | Malnutrition of moderate degree                             |
|             | 2631        | Malnutrition of mild degree                                 |
|             | 2632        | Arrested development following protein-calorie malnutrition |
|             | 2638        | Other protein-calorie malnutrition                          |
|             | 2639        | Unspecified protein-calorie malnutrition                    |

|                       |             |                                                          |
|-----------------------|-------------|----------------------------------------------------------|
| Electrolyte Disorders | <b>ICD9</b> | <b>ICD9 Description</b>                                  |
|                       | 2760        | Hyperosmolality and/or hypernatremia                     |
|                       | 2761        | Hyposmolality and/or hyponatremia                        |
|                       | 2762        | Acidosis                                                 |
|                       | 2763        | Alkalosis                                                |
|                       | 2764        | Mixed acid-base balance disorder                         |
|                       | 27650       | Volume depletion, unspecified                            |
|                       | 27651       | Dehydration                                              |
|                       | 27652       | Hypovolemia                                              |
|                       | 27661       | Transfusion associated circulatory overload              |
|                       | 27669       | Other fluid overload                                     |
|                       | 2767        | Hyperpotassemia                                          |
|                       | 2768        | Hypopotassemia                                           |
|                       | 2769        | Electrolyte and fluid disorders not elsewhere classified |

|                    |             |                         |
|--------------------|-------------|-------------------------|
| Anemia, blood loss | <b>ICD9</b> | <b>ICD9 Description</b> |
|--------------------|-------------|-------------------------|

|  |      |                                                          |
|--|------|----------------------------------------------------------|
|  | 2800 | Iron deficiency anemia secondary to blood loss (chronic) |
|--|------|----------------------------------------------------------|

| Anemia | ICD9 | ICD9 Description                                                   |
|--------|------|--------------------------------------------------------------------|
|        | 2801 | Iron deficiency anemia secondary to inadequate dietary iron intake |
|        | 2808 | Other specified iron deficiency anemias                            |
|        | 2809 | Iron deficiency anemia, unspecified                                |
|        | 2810 | Pernicious anemia                                                  |
|        | 2811 | Other vitamin B12 deficiency anemia                                |
|        | 2812 | Folate-deficiency anemia                                           |
|        | 2813 | Other specified megaloblastic anemias not elsewhere classified     |
|        | 2814 | Protein-deficiency anemia                                          |
|        | 2818 | Anemia associated with other specified nutritional deficiency      |
|        | 2819 | Unspecified deficiency anemia                                      |
|        | 2859 | Anemia, unspecified                                                |

| Alcohol | ICD9  | ICD9 Description                                       |
|---------|-------|--------------------------------------------------------|
|         | 2911  | Alcohol-induced persisting amnestic disorder           |
|         | 2912  | Alcohol-induced persisting dementia                    |
|         | 2915  | Alcohol-induced psychotic disorder with delusions      |
|         | 29181 | Alcohol withdrawal                                     |
|         | 29182 | Alcohol induced sleep disorders                        |
|         | 29189 | Other alcohol-induced mental disorders                 |
|         | 2919  | Unspecified alcohol-induced mental disorders           |
|         | 30390 | Other and unspecified alcohol dependence, unspecified  |
|         | 30391 | Other and unspecified alcohol dependence, continuous   |
|         | 30392 | Other and unspecified alcohol dependence, episodic     |
|         | 30393 | Other and unspecified alcohol dependence, in remission |
|         | 30500 | Alcohol abuse, unspecified                             |
|         | 30501 | Alcohol abuse, continuous                              |
|         | 30502 | Alcohol abuse, episodic                                |
|         | 30503 | Alcohol abuse, in remission                            |
|         | V113  | History of alcoholism                                  |

| Drug Abuse | ICD9  | ICD9 Description                          |
|------------|-------|-------------------------------------------|
|            | 2920  | Drug withdrawal                           |
|            | 29282 | Drug-induced persisting dementia          |
|            | 29283 | Drug-induced persisting amnestic disorder |
|            | 29284 | Drug-induced mood disorder                |



|       |                                                                   |
|-------|-------------------------------------------------------------------|
| 29285 | Drug induced sleep disorders                                      |
| 29289 | Other specified drug-induced mental disorders                     |
| 2929  | Unspecified drug-induced mental disorder                          |
| 30400 | Opioid type dependence, unspecified                               |
| 30401 | Opioid type dependence, continuous                                |
| 30402 | Opioid type dependence, episodic                                  |
| 30403 | Opioid type dependence, in remission                              |
| 30550 | Opioid abuse, unspecified                                         |
| 30551 | Opioid abuse, continuous                                          |
| 30552 | Opioid abuse, episodic                                            |
| 30553 | Opioid abuse, in remission                                        |
| 30560 | Cocaine abuse, unspecified                                        |
| 30561 | Cocaine abuse, continuous                                         |
| 30562 | Cocaine abuse, episodic                                           |
| 30563 | Cocaine abuse, in remission                                       |
| 30570 | Amphetamine or related acting sympathomimetic abuse, unspecified  |
| 30571 | Amphetamine or related acting sympathomimetic abuse, continuous   |
| 30572 | Amphetamine or related acting sympathomimetic abuse, episodic     |
| 30573 | Amphetamine or related acting sympathomimetic abuse, in remission |
| 30580 | Antidepressant type abuse, unspecified                            |
| 30581 | Antidepressant type abuse, continuous                             |
| 30582 | Antidepressant type abuse, episodic                               |
| 30583 | Antidepressant type abuse, in remission                           |
| 30590 | Other, mixed, or unspecified drug abuse, unspecified              |
| 30591 | Other, mixed, or unspecified drug abuse, continuous               |
| 30592 | Other, mixed, or unspecified drug abuse, episodic                 |
| 30593 | Other, mixed, or unspecified drug abuse, in remission             |

| Depression | ICD9  | ICD9 Description                              |
|------------|-------|-----------------------------------------------|
|            | 3004  | Dysthymic disorder                            |
|            | 30112 | Chronic depressive personality disorder       |
|            | 3090  | Adjustment disorder with depressed mood       |
|            | 3091  | Prolonged depressive reaction                 |
|            | 311   | Depressive disorder, not elsewhere classified |

| Psychoses | ICD9  | ICD9 Description                                              |
|-----------|-------|---------------------------------------------------------------|
|           | 29500 | Simple type schizophrenia, unspecified                        |
|           | 29501 | Simple type schizophrenia, subchronic                         |
|           | 29502 | Simple type schizophrenia, chronic                            |
|           | 29503 | Simple type schizophrenia, subchronic with acute exacerbation |

|       |                                                                            |
|-------|----------------------------------------------------------------------------|
| 29504 | Simple type schizophrenia, chronic with acute exacerbation                 |
| 29505 | Simple type schizophrenia, in remission                                    |
| 29550 | Latent schizophrenia, unspecified                                          |
| 29551 | Latent schizophrenia, subchronic                                           |
| 29552 | Latent schizophrenia, chronic                                              |
| 29553 | Latent schizophrenia, subchronic with acute exacerbation                   |
| 29554 | Latent schizophrenia, chronic with acute exacerbation                      |
| 29555 | Latent schizophrenia, in remission                                         |
| 29580 | Other specified types of schizophrenia, unspecified                        |
| 29581 | Other specified types of schizophrenia, subchronic                         |
| 29582 | Other specified types of schizophrenia, chronic                            |
| 29583 | Other specified types of schizophrenia, subchronic with acute exacerbation |
| 29584 | Other specified types of schizophrenia, chronic with acute exacerbation    |
| 29585 | Other specified types of schizophrenia, in remission                       |
| 29510 | Disorganized type schizophrenia, unspecified                               |
| 29511 | Disorganized type schizophrenia, subchronic                                |
| 29512 | Disorganized type schizophrenia, chronic                                   |
| 29513 | Disorganized type schizophrenia, subchronic with acute exacerbation        |
| 29514 | Disorganized type schizophrenia, chronic with acute exacerbation           |
| 29515 | Disorganized type schizophrenia, in remission                              |
| 29520 | Catatonic type schizophrenia, unspecified                                  |
| 29521 | Catatonic type schizophrenia, subchronic                                   |
| 29522 | Catatonic type schizophrenia, chronic                                      |
| 29523 | Catatonic type schizophrenia, subchronic with acute exacerbation           |
| 29524 | Catatonic type schizophrenia, chronic with acute exacerbation              |
| 29525 | Catatonic type schizophrenia, in remission                                 |
| 29530 | Paranoid type schizophrenia, unspecified                                   |
| 29531 | Paranoid type schizophrenia, subchronic                                    |
| 29532 | Paranoid type schizophrenia, chronic                                       |
| 29533 | Paranoid type schizophrenia, subchronic with acute exacerbation            |
| 29534 | Paranoid type schizophrenia, chronic with acute exacerbation               |
| 29535 | Paranoid type schizophrenia, in remission                                  |
| 29540 | Schizophreniform disorder, unspecified                                     |
| 29541 | Schizophreniform disorder, subchronic                                      |
| 29542 | Schizophreniform disorder, chronic                                         |
| 29543 | Schizophreniform disorder, subchronic with acute exacerbation              |
| 29544 | Schizophreniform disorder, chronic with acute exacerbation                 |
| 29545 | Schizophreniform disorder, in remission                                    |

|       |                                                                                            |
|-------|--------------------------------------------------------------------------------------------|
| 29560 | Schizophrenic disorders, residual type, unspecified                                        |
| 29561 | Schizophrenic disorders, residual type, subchronic                                         |
| 29562 | Schizophrenic disorders, residual type, chronic                                            |
| 29563 | Schizophrenic disorders, residual type, subchronic with acute exacerbation                 |
| 29564 | Schizophrenic disorders, residual type, chronic with acute exacerbation                    |
| 29565 | Schizophrenic disorders, residual type, in remission                                       |
| 29670 | Schizoaffective disorder, unspecified                                                      |
| 29671 | Schizoaffective disorder, subchronic                                                       |
| 29672 | Schizoaffective disorder, chronic                                                          |
| 29673 | Schizoaffective disorder, subchronic with acute exacerbation                               |
| 29674 | Schizoaffective disorder, chronic with acute exacerbation                                  |
| 29675 | Schizoaffective disorder, in remission                                                     |
| 29590 | Unspecified schizophrenia, unspecified                                                     |
| 29591 | Unspecified schizophrenia, subchronic                                                      |
| 29592 | Unspecified schizophrenia, chronic                                                         |
| 29593 | Unspecified schizophrenia, subchronic with acute exacerbation                              |
| 29594 | Unspecified schizophrenia, chronic with acute exacerbation                                 |
| 29595 | Unspecified schizophrenia, in remission                                                    |
| 29600 | Bipolar I disorder, single manic episode, unspecified                                      |
| 29610 | Manic affective disorder, recurrent episode, unspecified                                   |
| 29601 | Bipolar I disorder, single manic episode, mild                                             |
| 29611 | Manic affective disorder, recurrent episode, mild                                          |
| 29602 | Bipolar I disorder, single manic episode, moderate                                         |
| 29613 | Manic affective disorder, recurrent episode, severe, without mention of psychotic behavior |
| 29603 | Bipolar I disorder, single manic episode, severe, without mention of psychotic behavior    |
| 29612 | Manic affective disorder, recurrent episode, moderate                                      |
| 29604 | Bipolar I disorder, single manic episode, severe, specified as with psychotic behavior     |
| 29614 | Manic affective disorder, recurrent episode, severe, specified as with psychotic behavior  |
| 29605 | Bipolar I disorder, single manic episode, in partial or unspecified remission              |
| 29615 | Manic affective disorder, recurrent episode, in partial or unspecified remission           |
| 29606 | Bipolar I disorder, single manic episode, in full remission                                |
| 29616 | Manic affective disorder, recurrent episode, in full remission                             |

|       |                                                                                                           |
|-------|-----------------------------------------------------------------------------------------------------------|
| 29620 | Major depressive affective disorder, single episode, unspecified                                          |
| 29621 | Major depressive affective disorder, single episode, mild                                                 |
| 29622 | Major depressive affective disorder, single episode, moderate                                             |
| 29623 | Major depressive affective disorder, single episode, severe, without mention of psychotic behavior        |
| 29624 | Major depressive affective disorder, single episode, severe, specified as with psychotic behavior         |
| 29625 | Major depressive affective disorder, single episode, in partial or unspecified remission                  |
| 29626 | Major depressive affective disorder, single episode, in full remission                                    |
| 29630 | Major depressive affective disorder, recurrent episode, unspecified                                       |
| 29631 | Major depressive affective disorder, recurrent episode, mild                                              |
| 29632 | Major depressive affective disorder, recurrent episode, moderate                                          |
| 29633 | Major depressive affective disorder, recurrent episode, severe, without mention of psychotic behavior     |
| 29634 | Major depressive affective disorder, recurrent episode, severe, specified as with psychotic behavior      |
| 29635 | Major depressive affective disorder, recurrent episode, in partial or unspecified remission               |
| 29636 | Major depressive affective disorder, recurrent episode, in full remission                                 |
| 29640 | Bipolar I disorder, most recent episode (or current) manic, unspecified                                   |
| 29641 | Bipolar I disorder, most recent episode (or current) manic, mild                                          |
| 29642 | Bipolar I disorder, most recent episode (or current) manic, moderate                                      |
| 29643 | Bipolar I disorder, most recent episode (or current) manic, severe, without mention of psychotic behavior |
| 29644 | Bipolar I disorder, most recent episode (or current) manic, severe, specified as with psychotic behavior  |
| 29645 | Bipolar I disorder, most recent episode (or current) manic, in partial or unspecified remission           |
| 29646 | Bipolar I disorder, most recent episode (or current) manic, in full remission                             |
| 29650 | Bipolar I disorder, most recent episode (or current) depressed, unspecified                               |

|       |                                                                                                               |
|-------|---------------------------------------------------------------------------------------------------------------|
| 29651 | Bipolar I disorder, most recent episode (or current) depressed, mild                                          |
| 29652 | Bipolar I disorder, most recent episode (or current) depressed, moderate                                      |
| 29653 | Bipolar I disorder, most recent episode (or current) depressed, severe, without mention of psychotic behavior |
| 29654 | Bipolar I disorder, most recent episode (or current) depressed, severe, specified as with psychotic behavior  |
| 29655 | Bipolar I disorder, most recent episode (or current) depressed, in partial or unspecified remission           |
| 29656 | Bipolar I disorder, most recent episode (or current) depressed, in full remission                             |
| 29660 | Bipolar I disorder, most recent episode (or current) mixed, unspecified                                       |
| 29660 | Bipolar I disorder, most recent episode (or current) mixed, mild                                              |
| 29660 | Bipolar I disorder, most recent episode (or current) mixed, moderate                                          |
| 29660 | Bipolar I disorder, most recent episode (or current) mixed, severe, without mention of psychotic behavior     |
| 29660 | Bipolar I disorder, most recent episode (or current) mixed, severe, specified as with psychotic behavior      |
| 29660 | Bipolar I disorder, most recent episode (or current) mixed, in partial or unspecified remission               |
| 29660 | Bipolar I disorder, most recent episode (or current) mixed, in full remission                                 |
| 2967  | Bipolar I disorder, most recent episode (or current) unspecified                                              |
| 29680 | Bipolar disorder, unspecified                                                                                 |
| 29681 | Atypical manic disorder                                                                                       |
| 29682 | Atypical depressive disorder                                                                                  |
| 29689 | Other bipolar disorders                                                                                       |
| 29690 | Unspecified episodic mood disorder                                                                            |
| 29699 | Other specified episodic mood disorder                                                                        |
| 2970  | Paranoid state, simple                                                                                        |
| 2971  | Delusional disorder                                                                                           |
| 2972  | Paraphrenia                                                                                                   |
| 2978  | Other specified paranoid states                                                                               |
| 2973  | Shared psychotic disorder                                                                                     |
| 2979  | Unspecified paranoid state                                                                                    |
| 2983  | Acute paranoid reaction                                                                                       |
| 2984  | Psychogenic paranoid psychosis                                                                                |
| 2988  | Other and unspecified reactive psychosis                                                                      |
| 2980  | Depressive type psychosis                                                                                     |
| 2981  | Excitative type psychosis                                                                                     |

|       |                                                            |
|-------|------------------------------------------------------------|
| 2982  | Reactive confusion                                         |
| 2989  | Unspecified psychosis                                      |
| 29910 | Childhood disintegrative disorder, current or active state |
| 29911 | Childhood disintegrative disorder, residual state          |

**e Figure 3: Cohort Construction, 2011-2015**

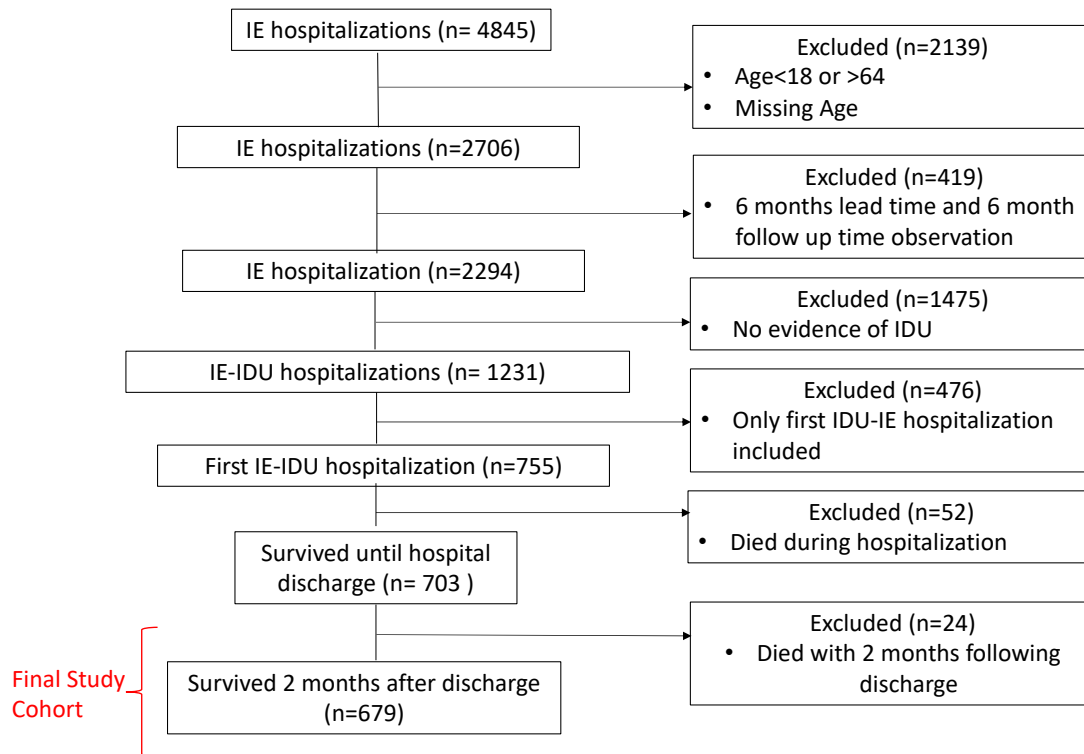

**e Table 4: Sensitivity Analyses: Adjusted\* Cox Proportional Hazard Models for association of MOUD with All-Cause Mortality, July 2011 to June 2015**

|                                                  |             |        | Model 1                                                         | Model 2                                                                      | Model 3                                                                                              |
|--------------------------------------------------|-------------|--------|-----------------------------------------------------------------|------------------------------------------------------------------------------|------------------------------------------------------------------------------------------------------|
|                                                  | Sample size | Deaths | MOUD within 3 Months Following IDU-IE (Cox Proportional Hazard) | Monthly MOUD Receipt following IDU-IE (Time Varying Cox Proportional Hazard) | Monthly, including month of discontinuation, following IDU-IE (Time Varying Cox Proportional Hazard) |
| Main model                                       | 679         | 61     | 1.29 (0.61-2.72)                                                | 0.30 (0.10-0.89)                                                             | 0.39 (0.15-1.00)                                                                                     |
| Hepatitis C removed from inclusion criteria      | 621         | 52     | 1.25 (0.60-2.64)                                                | 0.30 (0.10-0.87)                                                             | 0.38 (0.15-0.98)                                                                                     |
| Upper age limit removed from inclusion criteria  | 712         | 70     | 1.15 (0.55-2.40)                                                | 0.28 (0.10-0.84)                                                             | 0.37 (0.15-0.93)                                                                                     |
| Minimum survival requirement, month of discharge | 693         | 75     | 0.74 (0.36-1.52)                                                | 0.35 (0.14-0.89)                                                             | 0.27 (0.09-0.80)                                                                                     |

\*Models adjusted for MOUD 3 months prior to admission, age, sex, Elixhauser score, major mental illness, homelessness.
